# Supplementary material for: Comprehensive single-cell and bulk RNA-seq analyses reveal a novel CD8+ T cell-associated prognostic signature in ovarian cancer
Source: publisher site journal article supplement (doi:10.18632/aging.205966), 2024-06-25
Supplement: Supplementary file [file aging-v16-205966-supplementary-material-SD1.pdf]

SUPPLEMENTARY FIGURES

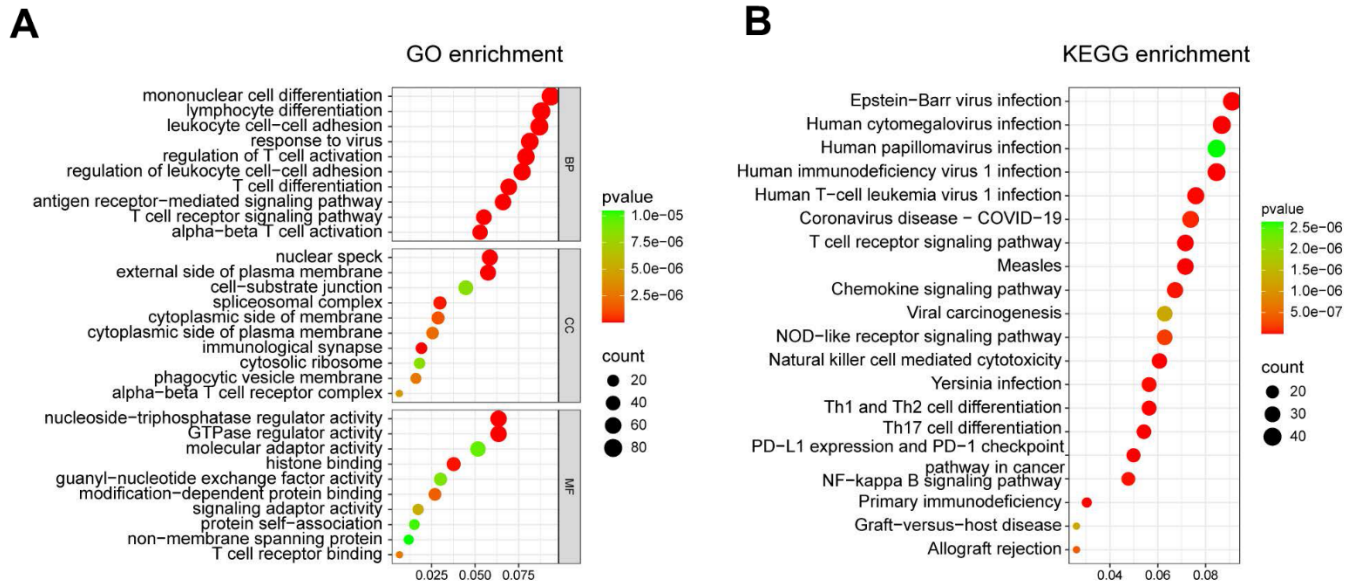

Supplementary Figure 1. GO/KEGG enrichment for CD8<sup>+</sup> signature genes. (A) GO enrichment for CD8<sup>+</sup> signature genes. (B) KEGG enrichment for CD8<sup>+</sup> signature genes.

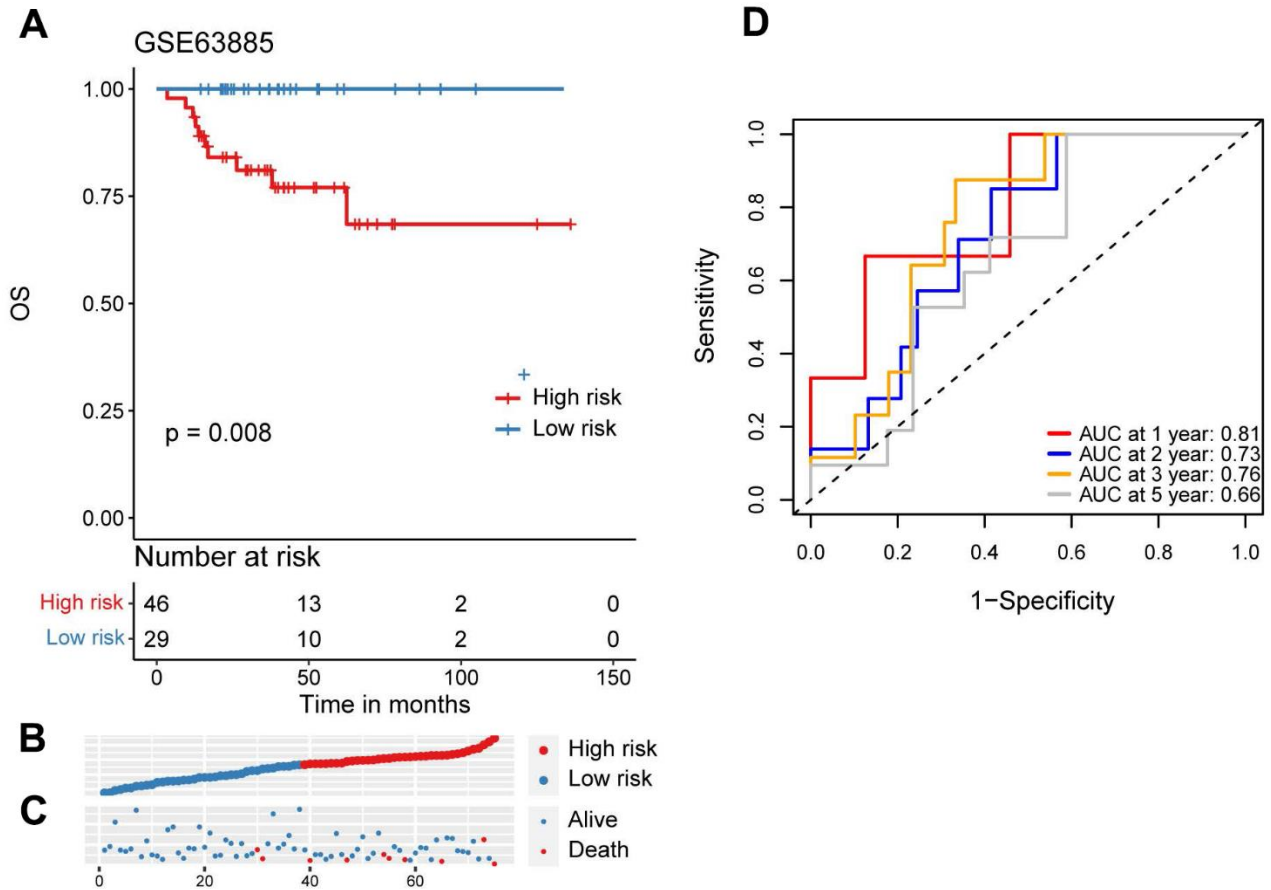

**Supplementary Figure 2. Construction and validation of a prognostic model based on CD8<sup>+</sup> T cell markers in ovarian cancer.** (A) Kaplan-Meier survival analysis was performed on the relationship between the risk score and OS using the GSE63885 validation cohort. (B) The rank of risk scores in the GSE63885 validation cohort. (C) Survival status in the GSE63885 validation cohort. (D) Time-dependent ROC curve analysis of the prognostic model (1, 2, 3, and 5 years) in the GSE63885 validation cohort.

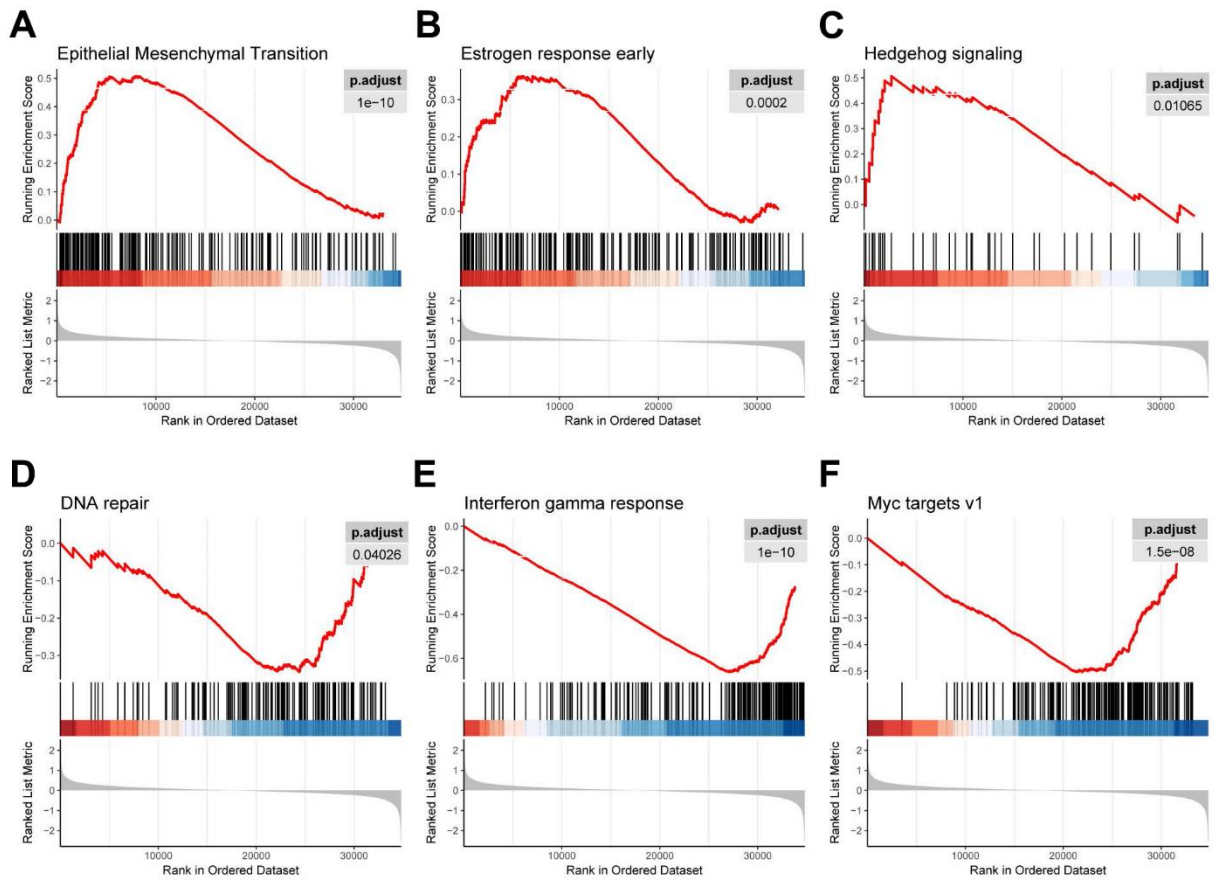

**Supplementary Figure 3. Correlation between the risk score and pathway activities.** (A–C) GSEA analysis showing the up-regulated pathways in the high-risk group. (D–F) GSEA analysis showing the up-regulated pathways in the low-risk group.

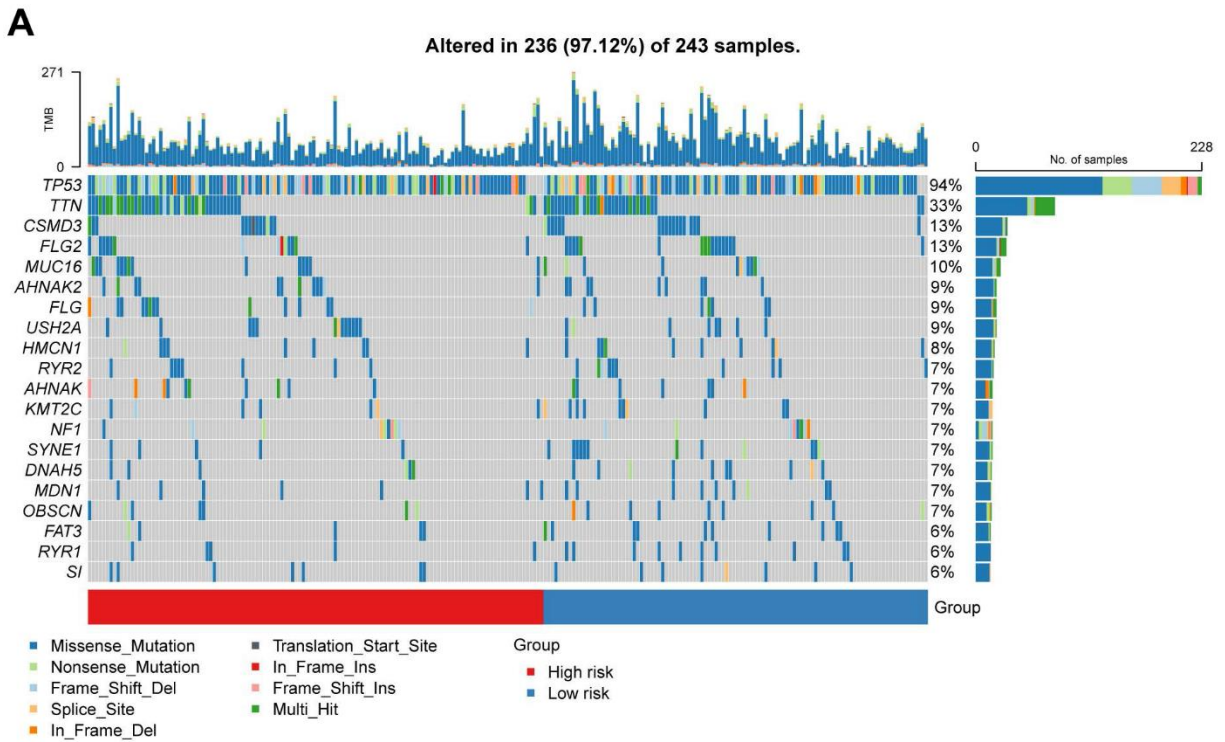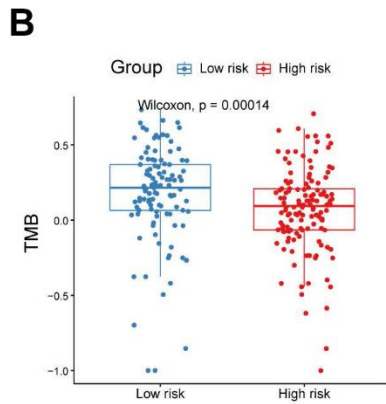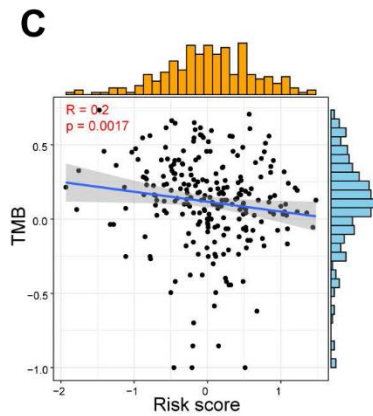

**Supplementary Figure 4.** Mutation analysis of high/low-risk groups (A). Comparison of the mutation landscape between groups with high/low risk. (B) TMB score in high/low-risk groups. (C) Spearman correlation between TMB score and risk score.
