# Supplementary material for: Comprehensive single-cell and bulk RNA-seq analyses reveal a novel CD8+ T cell-associated prognostic signature in ovarian cancer
Source: Aging (Albany NY). 2024 Jun 25;16(12):10636–56. doi: 10.18632/aging.205966 (PMC11236322; doi:10.18632/aging.205966)
Supplement: Supplementary Table 1 [file aging-16-205966-s002.xlsx]

## Sheet: Supplementary Table 1
Supplementary Table 1. A list of marker genes for each cell subpopulation in ovarian cancer.
gene	p_val	avg_log2FC	pct.1	pct.2	p_val_adj	cluster
TNFRSF4	0	3.06441	0.85	0.114	0	CD4+ T cells
LTB	0	2.54776	0.945	0.371	0	CD4+ T cells
CTLA4	0	2.46739	0.865	0.121	0	CD4+ T cells
FOXP3	0	2.25639	0.733	0.028	0	CD4+ T cells
TNFRSF18	0	2.16834	0.834	0.195	0	CD4+ T cells
IL32	0	2.14281	0.981	0.593	0	CD4+ T cells
IL2RA	0	2.08211	0.579	0.036	0	CD4+ T cells
BATF	0	2.04185	0.767	0.194	0	CD4+ T cells
LAIR2	0	1.95246	0.634	0.057	0	CD4+ T cells
ICOS	0	1.94623	0.736	0.104	0	CD4+ T cells
TIGIT	0	1.89749	0.895	0.244	0	CD4+ T cells
TNFRSF1B	0	1.84791	0.833	0.331	0	CD4+ T cells
TRAC	0	1.77761	0.964	0.394	0	CD4+ T cells
SPOCK2	0	1.7273	0.848	0.257	0	CD4+ T cells
S100A4	0	1.6973	0.975	0.748	0	CD4+ T cells
CD27	0	1.69504	0.783	0.204	0	CD4+ T cells
CD3D	0	1.60486	0.963	0.331	0	CD4+ T cells
DUSP4	0	1.60199	0.709	0.224	0	CD4+ T cells
CARD16	0	1.55569	0.854	0.463	0	CD4+ T cells
TBC1D4	0	1.54303	0.659	0.157	0	CD4+ T cells
TNFRSF9	0	1.54139	0.495	0.077	0	CD4+ T cells
LINC01943	0	1.48296	0.579	0.097	0	CD4+ T cells
CD2	0	1.43454	0.978	0.426	0	CD4+ T cells
RTKN2	0	1.42202	0.438	0.068	0	CD4+ T cells
MAF	0	1.31303	0.765	0.283	0	CD4+ T cells
IKZF2	0	1.26248	0.559	0.12	0	CD4+ T cells
SH2D2A	0	1.23219	0.619	0.176	0	CD4+ T cells
LTA	0	1.16908	0.371	0.048	0	CD4+ T cells
HLA-A	0	1.13508	0.998	0.959	0	CD4+ T cells
SLAMF1	0	1.09481	0.552	0.118	0	CD4+ T cells
CD4	0	1.08575	0.658	0.2	0	CD4+ T cells
B2M	0	1.04507	1	0.984	0	CD4+ T cells
CD28	0	1.00076	0.456	0.061	0	CD4+ T cells
LINC02099	0	0.741135	0.229	0.006	0	CD4+ T cells
F5	0	0.664275	0.247	0.017	0	CD4+ T cells
AC017002.3	0	0.632392	0.223	0.015	0	CD4+ T cells
CD3E	9.31e-308	1.11729	0.864	0.326	2.03e-303	CD4+ T cells
IL2RG	1.25e-294	1.25989	0.895	0.459	2.72e-290	CD4+ T cells
CD3G	2.78e-287	1.00338	0.834	0.292	6.05e-283	CD4+ T cells
SIRPG	5.05e-287	0.90002	0.501	0.123	1.1e-282	CD4+ T cells
BIRC3	4.36e-285	1.48552	0.734	0.305	9.49e-281	CD4+ T cells
SIT1	8.14e-280	0.910135	0.583	0.163	1.77e-275	CD4+ T cells
SELL	2.07e-269	0.924353	0.443	0.106	4.5e-265	CD4+ T cells
ARID5B	1.46e-265	1.37422	0.751	0.377	3.18e-261	CD4+ T cells
TRBC2	5.4e-248	1.31374	0.807	0.355	1.18e-243	CD4+ T cells
CXCR3	2.18e-245	0.949262	0.603	0.199	4.74e-241	CD4+ T cells
CTSC	1.47e-244	1.50209	0.867	0.595	3.2e-240	CD4+ T cells
PIM2	2.64e-241	1.05058	0.49	0.147	5.76e-237	CD4+ T cells
GADD45A	1.11e-240	1.76043	0.631	0.284	2.41e-236	CD4+ T cells
IKZF4	1.6e-234	0.923187	0.368	0.089	3.48e-230	CD4+ T cells
LCK	2.75e-233	0.953355	0.769	0.309	6e-229	CD4+ T cells
CD79B	3.69e-224	0.822919	0.451	0.128	8.03e-220	CD4+ T cells
BTG1	8.59e-223	1.04361	0.984	0.826	1.87e-218	CD4+ T cells
CXCR6	2.02e-217	0.886264	0.512	0.15	4.39e-213	CD4+ T cells
PHLDA1	8.04e-214	1.27549	0.671	0.304	1.75e-209	CD4+ T cells
ARL6IP5	1.22e-211	1.05775	0.873	0.634	2.66e-207	CD4+ T cells
IL1R2	4.09e-207	0.678367	0.21	0.033	8.91e-203	CD4+ T cells
LAYN	1.6e-205	0.954198	0.399	0.115	3.49e-201	CD4+ T cells
HLA-C	3.75e-202	0.812664	0.992	0.93	8.16e-198	CD4+ T cells
DNPH1	3.32e-199	1.1531	0.687	0.389	7.24e-195	CD4+ T cells
CD7	2.12e-197	1.01683	0.75	0.317	4.62e-193	CD4+ T cells
CORO1B	1.39e-195	1.38183	0.713	0.442	3.02e-191	CD4+ T cells
GLRX	2.92e-190	1.2395	0.671	0.358	6.36e-186	CD4+ T cells
CD5	3.79e-189	0.562682	0.327	0.076	8.25e-185	CD4+ T cells
HLA-B	8.56e-189	0.746955	0.996	0.948	1.86e-184	CD4+ T cells
LAT	9.85e-188	0.84182	0.621	0.247	2.15e-183	CD4+ T cells
PBXIP1	7.52e-187	0.99651	0.602	0.276	1.64e-182	CD4+ T cells
CREM	3.77e-185	1.29596	0.616	0.311	8.21e-181	CD4+ T cells
TSC22D3	1.67e-184	1.1525	0.824	0.517	3.64e-180	CD4+ T cells
SKAP1	2.1e-183	0.853874	0.663	0.288	4.58e-179	CD4+ T cells
ICAM3	6e-183	0.943742	0.716	0.381	1.31e-178	CD4+ T cells
TRBC1	3.79e-179	1.51633	0.639	0.281	8.25e-175	CD4+ T cells
GMFG	2.09e-177	0.90495	0.833	0.488	4.56e-173	CD4+ T cells
P2RY10	4.51e-176	0.637377	0.394	0.113	9.82e-172	CD4+ T cells
RASGRP1	1.87e-174	0.868646	0.61	0.253	4.08e-170	CD4+ T cells
SAMSN1	1.48e-172	0.899918	0.71	0.345	3.23e-168	CD4+ T cells
IL18R1	3.27e-172	0.692361	0.284	0.066	7.13e-168	CD4+ T cells
IL2RB	2.44e-170	0.681568	0.684	0.274	5.31e-166	CD4+ T cells
CCND2	9.43e-170	1.00185	0.739	0.402	2.05e-165	CD4+ T cells
IL12RB2	2.84e-169	0.324558	0.121	0.013	6.2e-165	CD4+ T cells
ASB2	3.72e-169	0.515796	0.271	0.061	8.1e-165	CD4+ T cells
RGS1	4.01e-167	0.929492	0.91	0.581	8.73e-163	CD4+ T cells
FCMR	2.53e-165	0.660968	0.333	0.089	5.5e-161	CD4+ T cells
ISG20	2.79e-164	1.13946	0.801	0.489	6.07e-160	CD4+ T cells
STK17B	2.17e-159	0.925985	0.837	0.56	4.73e-155	CD4+ T cells
RHOH	4.98e-159	0.817315	0.569	0.235	1.08e-154	CD4+ T cells
SLA	5.63e-159	0.791602	0.694	0.336	1.23e-154	CD4+ T cells
HLA-E	4.65e-158	0.674691	0.988	0.891	1.01e-153	CD4+ T cells
GBP2	9.46e-158	0.982501	0.708	0.416	2.06e-153	CD4+ T cells
PHTF2	1.66e-157	0.909784	0.503	0.221	3.62e-153	CD4+ T cells
ARHGDIB	3.71e-157	0.837155	0.896	0.603	8.09e-153	CD4+ T cells
HLA-F	8.1e-157	0.811368	0.871	0.64	1.77e-152	CD4+ T cells
ETV7	1.28e-155	0.742157	0.411	0.142	2.78e-151	CD4+ T cells
TRAF1	4.27e-155	0.685177	0.394	0.126	9.31e-151	CD4+ T cells
TMEM173	3.15e-154	1.02611	0.585	0.303	6.87e-150	CD4+ T cells
CYTIP	3.98e-154	0.848107	0.739	0.393	8.67e-150	CD4+ T cells
PTPRC	2.7e-147	0.725957	0.951	0.615	5.88e-143	CD4+ T cells
ZBTB32	4.2e-147	0.379696	0.143	0.02	9.15e-143	CD4+ T cells
RAC2	1.05e-145	0.795968	0.847	0.515	2.29e-141	CD4+ T cells
GBP5	2.8e-145	0.750328	0.723	0.375	6.09e-141	CD4+ T cells
SOD1	2.13e-144	0.823205	0.874	0.678	4.64e-140	CD4+ T cells
MIR4435-2HG	1.72e-140	0.875299	0.53	0.255	3.74e-136	CD4+ T cells
ITM2A	4.37e-140	0.863178	0.648	0.307	9.52e-136	CD4+ T cells
ADTRP	1.96e-139	0.364128	0.127	0.017	4.26e-135	CD4+ T cells
CD247	4.86e-139	0.537809	0.703	0.307	1.06e-134	CD4+ T cells
EPSTI1	6.56e-138	0.903295	0.76	0.479	1.43e-133	CD4+ T cells
CALM3	1.59e-135	0.866404	0.777	0.568	3.47e-131	CD4+ T cells
H3F3B	6.3e-135	0.606988	0.988	0.931	1.37e-130	CD4+ T cells
PSMB9	2.17e-132	0.729127	0.887	0.69	4.73e-128	CD4+ T cells
PRDM1	2.78e-132	0.842063	0.603	0.304	6.07e-128	CD4+ T cells
TNFAIP3	5.91e-130	0.859403	0.799	0.499	1.29e-125	CD4+ T cells
TNFRSF25	4.65e-128	0.663973	0.434	0.171	1.01e-123	CD4+ T cells
ENTPD1	2.02e-127	0.809137	0.521	0.241	4.4e-123	CD4+ T cells
CORO1A	3e-127	0.710203	0.891	0.57	6.53e-123	CD4+ T cells
SRGN	5.03e-126	0.741501	0.928	0.639	1.1e-121	CD4+ T cells
BCL11B	6.63e-124	0.521013	0.451	0.168	1.44e-119	CD4+ T cells
CD53	1.71e-122	0.679864	0.796	0.469	3.71e-118	CD4+ T cells
TYMP	2.99e-122	1.00167	0.833	0.622	6.51e-118	CD4+ T cells
CCR4	3.5e-122	0.304263	0.12	0.017	7.62e-118	CD4+ T cells
DOK2	9.21e-119	0.719947	0.577	0.276	2.01e-114	CD4+ T cells
PFN1	1.83e-117	0.706296	0.93	0.818	3.98e-113	CD4+ T cells
GATA3	1.9e-117	0.648861	0.441	0.174	4.13e-113	CD4+ T cells
SUB1	2.82e-117	0.679651	0.911	0.781	6.15e-113	CD4+ T cells
TNFRSF8	7.76e-117	0.281862	0.105	0.014	1.69e-112	CD4+ T cells
RPL36AL	3.28e-116	0.584158	0.93	0.811	7.16e-112	CD4+ T cells
CD37	4.64e-116	0.618706	0.788	0.465	1.01e-111	CD4+ T cells
ITK	1e-115	0.483305	0.409	0.149	2.18e-111	CD4+ T cells
FBLN7	1.5e-115	0.317777	0.143	0.025	3.28e-111	CD4+ T cells
ARPC1B	1.1e-113	0.759586	0.846	0.669	2.39e-109	CD4+ T cells
IL21R	3.48e-113	0.604576	0.294	0.094	7.59e-109	CD4+ T cells
POU2F2	2.81e-112	0.719593	0.455	0.2	6.13e-108	CD4+ T cells
PMAIP1	3.4e-112	1.03603	0.538	0.29	7.41e-108	CD4+ T cells
CLEC2D	7.12e-112	0.710921	0.725	0.42	1.55e-107	CD4+ T cells
ZC3H12D	1.05e-111	0.485406	0.226	0.06	2.29e-107	CD4+ T cells
IL7R	5.61e-111	0.70335	0.437	0.174	1.22e-106	CD4+ T cells
CASP1	9.46e-111	0.730221	0.562	0.303	2.06e-106	CD4+ T cells
IL12RB1	2.2e-110	0.496412	0.298	0.097	4.79e-106	CD4+ T cells
SH2D1A	1.08e-105	0.50545	0.372	0.134	2.36e-101	CD4+ T cells
LIMD2	3.36e-105	0.664376	0.756	0.484	7.32e-101	CD4+ T cells
DUSP16	2.47e-104	0.63274	0.351	0.139	5.39e-100	CD4+ T cells
RAP1A	3e-103	0.768461	0.659	0.469	6.55e-99	CD4+ T cells
SOCS1	3.3e-103	0.826877	0.533	0.272	7.2e-99	CD4+ T cells
PTTG1	1.43e-102	0.640936	0.532	0.275	3.12e-98	CD4+ T cells
ISCU	1.45e-102	0.747762	0.697	0.517	3.15e-98	CD4+ T cells
OAZ1	1.46e-102	0.555943	0.941	0.845	3.17e-98	CD4+ T cells
RAB33A	2.23e-102	0.438668	0.24	0.069	4.85e-98	CD4+ T cells
MAGEH1	4.02e-102	1.09118	0.378	0.172	8.76e-98	CD4+ T cells
TRAF3IP3	4.32e-102	0.586156	0.624	0.326	9.4e-98	CD4+ T cells
COX17	6.61e-101	0.74148	0.712	0.54	1.44e-96	CD4+ T cells
PHACTR2	2.07e-100	0.789736	0.54	0.32	4.51e-96	CD4+ T cells
PVALB	2.61e-100	0.449335	0.127	0.023	5.69e-96	CD4+ T cells
FXYD5	3.33e-100	0.688256	0.726	0.502	7.26e-96	CD4+ T cells
PSMB8	4.85e-100	0.669949	0.806	0.643	1.06e-95	CD4+ T cells
RORA	8.36e-100	0.70489	0.548	0.285	1.82e-95	CD4+ T cells
DDX24	2.1e-99	0.584602	0.854	0.706	4.58e-95	CD4+ T cells
RAB11FIP1	3.07e-99	0.810366	0.607	0.361	6.68e-95	CD4+ T cells
TMSB10	4.12e-99	0.545149	0.996	0.969	8.97e-95	CD4+ T cells
DDX5	4.88e-98	0.466866	0.984	0.903	1.06e-93	CD4+ T cells
RPS27	5.01e-98	0.488293	0.99	0.951	1.09e-93	CD4+ T cells
DUSP2	7.14e-98	0.974308	0.689	0.435	1.55e-93	CD4+ T cells
TMEM154	2.58e-97	0.519743	0.32	0.117	5.61e-93	CD4+ T cells
UGP2	7.09e-97	0.953294	0.623	0.443	1.54e-92	CD4+ T cells
LINC02195	2.57e-96	0.375466	0.189	0.046	5.6e-92	CD4+ T cells
ATP5E	3.33e-96	0.490958	0.964	0.891	7.26e-92	CD4+ T cells
FANK1	5.68e-96	0.505867	0.169	0.041	1.24e-91	CD4+ T cells
COX5A	7.3e-96	0.859314	0.741	0.595	1.59e-91	CD4+ T cells
HTATIP2	2.04e-95	0.773201	0.459	0.25	4.44e-91	CD4+ T cells
CIRBP	1.23e-94	0.600749	0.82	0.686	2.69e-90	CD4+ T cells
EIF1	2.88e-94	0.449911	0.985	0.92	6.28e-90	CD4+ T cells
C9orf16	7.26e-94	0.708085	0.746	0.592	1.58e-89	CD4+ T cells
PTPN7	1.18e-93	0.54106	0.629	0.339	2.57e-89	CD4+ T cells
FAS	2.65e-93	0.616671	0.384	0.172	5.78e-89	CD4+ T cells
CLIC1	9.4e-93	0.570972	0.917	0.79	2.05e-88	CD4+ T cells
COX7C	4.72e-92	0.508053	0.924	0.81	1.03e-87	CD4+ T cells
CKLF	5.15e-92	0.735239	0.779	0.587	1.12e-87	CD4+ T cells
UCP2	1.52e-90	0.824949	0.683	0.471	3.31e-86	CD4+ T cells
OCIAD2	6.39e-90	0.606582	0.632	0.396	1.39e-85	CD4+ T cells
SUMO2	3.34e-89	0.549381	0.875	0.74	7.27e-85	CD4+ T cells
CD52	4.23e-89	0.459009	0.878	0.515	9.22e-85	CD4+ T cells
FOXO1	1.16e-88	0.631309	0.376	0.172	2.52e-84	CD4+ T cells
FYN	2.86e-88	0.564657	0.629	0.369	6.23e-84	CD4+ T cells
RNF213	3.26e-88	0.430974	0.911	0.794	7.1e-84	CD4+ T cells
2023-09-06	3.77e-88	0.605982	0.674	0.448	8.2e-84	CD4+ T cells
RPS27L	4.21e-88	0.778203	0.832	0.678	9.17e-84	CD4+ T cells
NDUFA4	8.94e-88	0.567333	0.857	0.721	1.95e-83	CD4+ T cells
GNG2	3.44e-87	0.524218	0.484	0.235	7.49e-83	CD4+ T cells
AC058791.1	3.62e-86	0.627694	0.375	0.167	7.88e-82	CD4+ T cells
RPL24	6.04e-86	0.434617	0.957	0.898	1.32e-81	CD4+ T cells
RPS26	7.88e-86	0.58499	0.923	0.797	1.72e-81	CD4+ T cells
CCR6	1.56e-85	0.395405	0.172	0.044	3.4e-81	CD4+ T cells
ETS1	4.69e-85	0.468178	0.71	0.419	1.02e-80	CD4+ T cells
RPS29	3.31e-84	0.450894	0.985	0.94	7.2e-80	CD4+ T cells
NCF4	5.14e-84	0.567137	0.402	0.193	1.12e-79	CD4+ T cells
PIK3IP1	7.76e-84	0.68604	0.507	0.284	1.69e-79	CD4+ T cells
SUSD3	1.01e-83	0.565272	0.453	0.232	2.19e-79	CD4+ T cells
TTC39C	1.54e-83	0.653303	0.511	0.289	3.35e-79	CD4+ T cells
CD48	1.61e-83	0.513961	0.779	0.473	3.5e-79	CD4+ T cells
SH3KBP1	1.03e-82	0.641003	0.609	0.401	2.25e-78	CD4+ T cells
CD80	1.22e-82	0.370371	0.151	0.037	2.65e-78	CD4+ T cells
JUND	2.4e-82	0.506083	0.984	0.92	5.24e-78	CD4+ T cells
PARK7	2.79e-82	0.563157	0.836	0.682	6.09e-78	CD4+ T cells
YWHAB	4.68e-82	0.52754	0.896	0.766	1.02e-77	CD4+ T cells
SMAP2	3.05e-81	0.708225	0.514	0.308	6.65e-77	CD4+ T cells
TOX2	5.77e-81	0.406193	0.204	0.062	1.26e-76	CD4+ T cells
ZBED2	1.87e-80	0.551256	0.186	0.054	4.07e-76	CD4+ T cells
MYL6	5.83e-80	0.471308	0.967	0.893	1.27e-75	CD4+ T cells
STAM	6.82e-80	0.702523	0.348	0.166	1.49e-75	CD4+ T cells
CYTOR	6.94e-80	0.758961	0.609	0.412	1.51e-75	CD4+ T cells
MAST4	7.09e-80	0.606241	0.354	0.164	1.55e-75	CD4+ T cells
ZNRF1	2.38e-79	0.675196	0.458	0.259	5.19e-75	CD4+ T cells
ZNF831	1.45e-78	0.299079	0.195	0.056	3.16e-74	CD4+ T cells
TBC1D10C	2.88e-78	0.421674	0.597	0.32	6.28e-74	CD4+ T cells
CD70	1.32e-77	0.561438	0.208	0.065	2.87e-73	CD4+ T cells
UBC	1.47e-77	0.416029	0.981	0.925	3.2e-73	CD4+ T cells
HINT1	2.64e-77	0.512508	0.888	0.736	5.76e-73	CD4+ T cells
SPATS2L	1.44e-76	0.756136	0.631	0.451	3.14e-72	CD4+ T cells
ANAPC16	2.24e-76	0.583653	0.736	0.6	4.88e-72	CD4+ T cells
TERF2IP	6.75e-75	0.605083	0.67	0.521	1.47e-70	CD4+ T cells
ACP5	1.1e-73	0.605582	0.44	0.235	2.4e-69	CD4+ T cells
COMMD6	1.65e-72	0.529285	0.819	0.689	3.59e-68	CD4+ T cells
STAT3	2.94e-72	0.582578	0.741	0.604	6.41e-68	CD4+ T cells
TNFRSF13B	3.13e-72	0.304981	0.125	0.029	6.83e-68	CD4+ T cells
GALM	3.27e-72	0.604454	0.513	0.314	7.13e-68	CD4+ T cells
JAK1	5.18e-72	0.531821	0.732	0.592	1.13e-67	CD4+ T cells
PKIA	6.53e-72	0.301851	0.153	0.041	1.42e-67	CD4+ T cells
RPL34	8.7e-72	0.370642	0.981	0.924	1.9e-67	CD4+ T cells
ATP6V0E1	1.16e-71	0.476944	0.849	0.721	2.53e-67	CD4+ T cells
RPL19	1.62e-71	0.361445	0.984	0.926	3.53e-67	CD4+ T cells
RPL11	1.83e-71	0.327083	0.982	0.934	3.99e-67	CD4+ T cells
SARAF	6.89e-71	0.542478	0.783	0.666	1.5e-66	CD4+ T cells
RPL28	7.16e-71	0.346887	0.99	0.971	1.56e-66	CD4+ T cells
SH3BGRL3	7.7e-71	0.44571	0.942	0.826	1.68e-66	CD4+ T cells
PSMA5	4.09e-70	0.531668	0.704	0.55	8.92e-66	CD4+ T cells
SP100	4.9e-70	0.491191	0.774	0.628	1.07e-65	CD4+ T cells
PCED1B	1.47e-69	0.509035	0.358	0.172	3.2e-65	CD4+ T cells
SP140	4.21e-69	0.447568	0.456	0.237	9.18e-65	CD4+ T cells
PBX4	8.53e-69	0.29091	0.172	0.051	1.86e-64	CD4+ T cells
HCLS1	4.16e-68	0.470742	0.644	0.409	9.06e-64	CD4+ T cells
C12orf57	1.16e-67	0.583438	0.708	0.539	2.54e-63	CD4+ T cells
ACTB	1.3e-67	0.409876	0.99	0.946	2.84e-63	CD4+ T cells
CFLAR	4.11e-67	0.572834	0.742	0.602	8.95e-63	CD4+ T cells
AC005224.3	5.9e-67	0.319763	0.123	0.029	1.28e-62	CD4+ T cells
IL10RA	5.86e-66	0.513839	0.537	0.319	1.28e-61	CD4+ T cells
CDKN1B	4.09e-65	0.594333	0.54	0.359	8.91e-61	CD4+ T cells
CRADD	7.25e-65	0.389944	0.188	0.064	1.58e-60	CD4+ T cells
ACAP1	1.16e-64	0.272993	0.745	0.465	2.53e-60	CD4+ T cells
TNIK	1.72e-64	0.390952	0.26	0.105	3.75e-60	CD4+ T cells
IZUMO4	1.84e-64	0.257481	0.117	0.028	4.01e-60	CD4+ T cells
SAT1	5.69e-64	0.481187	0.935	0.806	1.24e-59	CD4+ T cells
CSK	5.97e-64	0.528414	0.563	0.374	1.3e-59	CD4+ T cells
FMNL1	7.37e-64	0.467499	0.645	0.424	1.61e-59	CD4+ T cells
EBI3	7.44e-64	0.429098	0.153	0.046	1.62e-59	CD4+ T cells
RPS15	1.9e-63	0.340556	0.98	0.93	4.13e-59	CD4+ T cells
FAM89B	2.46e-63	0.753092	0.546	0.408	5.36e-59	CD4+ T cells
RHOF	2.69e-63	0.469949	0.461	0.261	5.85e-59	CD4+ T cells
ISG15	4.58e-63	0.771234	0.875	0.755	9.98e-59	CD4+ T cells
RPL6	5.01e-63	0.364546	0.971	0.894	1.09e-58	CD4+ T cells
JPT1	5.99e-63	0.57472	0.669	0.52	1.31e-58	CD4+ T cells
ATPIF1	1.09e-62	0.499497	0.798	0.678	2.38e-58	CD4+ T cells
EFHD2	1.69e-62	0.591582	0.638	0.474	3.69e-58	CD4+ T cells
UQCRB	2.09e-62	0.442763	0.896	0.79	4.55e-58	CD4+ T cells
RHOG	3.04e-62	0.561589	0.566	0.388	6.61e-58	CD4+ T cells
RPL26	4e-62	0.352731	0.965	0.904	8.71e-58	CD4+ T cells
CUL9	4.89e-62	0.507141	0.244	0.102	1.06e-57	CD4+ T cells
EPHX2	5.02e-62	0.44895	0.197	0.072	1.09e-57	CD4+ T cells
BTLA	5.34e-62	0.267621	0.124	0.031	1.16e-57	CD4+ T cells
NDFIP1	7.79e-62	0.620922	0.602	0.473	1.7e-57	CD4+ T cells
IFI6	1.77e-61	0.768184	0.786	0.642	3.85e-57	CD4+ T cells
FAM129A	2.9e-61	0.584066	0.427	0.247	6.32e-57	CD4+ T cells
HS3ST3B1	3.54e-61	0.319203	0.142	0.04	7.71e-57	CD4+ T cells
TOMM7	6.29e-61	0.423125	0.86	0.742	1.37e-56	CD4+ T cells
LCP2	1.25e-60	0.422442	0.601	0.362	2.73e-56	CD4+ T cells
PIM3	1.41e-60	1.05102	0.469	0.316	3.07e-56	CD4+ T cells
ARF6	2.55e-60	0.548248	0.698	0.574	5.55e-56	CD4+ T cells
HERC5	2.94e-60	0.735999	0.464	0.284	6.41e-56	CD4+ T cells
CISH	7.15e-60	0.596031	0.363	0.183	1.56e-55	CD4+ T cells
RGS10	7.51e-60	0.434155	0.686	0.495	1.64e-55	CD4+ T cells
CDC42SE2	8.11e-60	0.514816	0.619	0.455	1.77e-55	CD4+ T cells
AQP3	1.08e-59	0.503321	0.291	0.136	2.35e-55	CD4+ T cells
GPSM3	1.08e-59	0.487785	0.599	0.405	2.36e-55	CD4+ T cells
MALAT1	2.59e-59	0.310544	1	0.992	5.65e-55	CD4+ T cells
APBB1IP	5.64e-59	0.409932	0.585	0.353	1.23e-54	CD4+ T cells
NOP10	6.46e-59	0.503603	0.726	0.608	1.41e-54	CD4+ T cells
DDIT4	9.46e-59	0.757703	0.56	0.385	2.06e-54	CD4+ T cells
C4orf48	1.1e-58	0.569928	0.579	0.432	2.4e-54	CD4+ T cells
MYL12A	1.17e-58	0.404926	0.915	0.821	2.54e-54	CD4+ T cells
S1PR4	1.36e-58	0.413743	0.354	0.171	2.97e-54	CD4+ T cells
CHURC1	2.11e-58	0.498534	0.668	0.54	4.6e-54	CD4+ T cells
TMEM50A	2.23e-58	0.497978	0.717	0.602	4.86e-54	CD4+ T cells
ITGAL	2.9e-58	0.366997	0.498	0.28	6.33e-54	CD4+ T cells
STAT1	3.44e-58	0.587673	0.743	0.594	7.49e-54	CD4+ T cells
PDCD1	3.46e-58	0.272068	0.275	0.11	7.53e-54	CD4+ T cells
GLCCI1	4.02e-58	0.557945	0.364	0.195	8.75e-54	CD4+ T cells
BCL2	4.45e-58	0.417027	0.508	0.305	9.69e-54	CD4+ T cells
GTF3C6	1.07e-57	0.495734	0.611	0.46	2.33e-53	CD4+ T cells
NDUFV2	1.2e-57	0.4816	0.686	0.567	2.61e-53	CD4+ T cells
PPM1G	1.66e-57	0.57087	0.605	0.474	3.62e-53	CD4+ T cells
ARPC2	1.85e-57	0.400417	0.902	0.818	4.03e-53	CD4+ T cells
ZNF101	2.5e-57	0.521861	0.314	0.152	5.45e-53	CD4+ T cells
TLK1	3.52e-57	0.587722	0.484	0.329	7.67e-53	CD4+ T cells
OAS1	4.79e-57	0.711233	0.516	0.35	1.04e-52	CD4+ T cells
RPL21	7.45e-57	0.354924	0.963	0.896	1.62e-52	CD4+ T cells
NDUFB8	5.75e-56	0.484091	0.714	0.593	1.25e-51	CD4+ T cells
SRP14	1.71e-55	0.353225	0.925	0.822	3.72e-51	CD4+ T cells
LPXN	3.51e-55	0.452564	0.423	0.24	7.65e-51	CD4+ T cells
EMP3	4.35e-55	0.530498	0.741	0.576	9.48e-51	CD4+ T cells
MXD4	9.82e-54	0.625484	0.582	0.462	2.14e-49	CD4+ T cells
TNIP3	1.24e-53	0.313772	0.202	0.074	2.69e-49	CD4+ T cells
TRIR	1.41e-53	0.39867	0.798	0.694	3.06e-49	CD4+ T cells
CST7	1.74e-53	0.42366	0.563	0.328	3.79e-49	CD4+ T cells
SAMD9	2.08e-53	0.496327	0.633	0.46	4.54e-49	CD4+ T cells
RASSF5	6.4e-53	0.422349	0.43	0.245	1.39e-48	CD4+ T cells
LFNG	5.65e-52	0.433461	0.337	0.176	1.23e-47	CD4+ T cells
TPT1	6.56e-52	0.284499	0.99	0.96	1.43e-47	CD4+ T cells
SERPINB9	7.07e-52	0.577651	0.392	0.228	1.54e-47	CD4+ T cells
NTNG2	8.76e-52	0.279294	0.113	0.031	1.91e-47	CD4+ T cells
UBB	1.09e-51	0.369946	0.919	0.804	2.38e-47	CD4+ T cells
RPS28	1.51e-51	0.312649	0.983	0.931	3.3e-47	CD4+ T cells
IL27RA	2.64e-51	0.448698	0.361	0.197	5.76e-47	CD4+ T cells
SON	3.66e-51	0.306917	0.893	0.821	7.97e-47	CD4+ T cells
RPS16	5.5e-51	0.279798	0.977	0.92	1.2e-46	CD4+ T cells
RPS15A	9.37e-51	0.3022	0.978	0.925	2.04e-46	CD4+ T cells
CHMP2A	2.41e-50	0.475798	0.653	0.547	5.25e-46	CD4+ T cells
EIF3K	9.87e-50	0.424185	0.767	0.647	2.15e-45	CD4+ T cells
UQCR11	1.07e-49	0.378022	0.801	0.685	2.32e-45	CD4+ T cells
KAT2B	1.53e-49	0.431966	0.291	0.145	3.33e-45	CD4+ T cells
VAMP8	1.67e-49	0.373557	0.776	0.604	3.64e-45	CD4+ T cells
ARPC3	2.06e-49	0.357936	0.9	0.792	4.49e-45	CD4+ T cells
MYO1G	2.15e-49	0.342955	0.433	0.242	4.68e-45	CD4+ T cells
PSMB1	4.69e-49	0.438643	0.735	0.634	1.02e-44	CD4+ T cells
STAMBPL1	8.82e-49	0.344173	0.242	0.107	1.92e-44	CD4+ T cells
COX8A	1.46e-48	0.367634	0.807	0.676	3.18e-44	CD4+ T cells
HNRNPA1	2.93e-48	0.354989	0.89	0.79	6.37e-44	CD4+ T cells
SPCS1	3.56e-48	0.455432	0.733	0.621	7.76e-44	CD4+ T cells
SLC27A2	7.02e-48	0.29201	0.144	0.048	1.53e-43	CD4+ T cells
SEC11C	7.14e-48	0.444189	0.562	0.418	1.56e-43	CD4+ T cells
ARPP19	1.05e-47	0.525904	0.543	0.424	2.28e-43	CD4+ T cells
TRADD	1.08e-47	0.53337	0.445	0.304	2.35e-43	CD4+ T cells
SELPLG	2.01e-47	0.365803	0.422	0.243	4.38e-43	CD4+ T cells
NABP1	2.33e-47	0.419814	0.524	0.357	5.08e-43	CD4+ T cells
PAIP2	2.63e-47	0.479156	0.619	0.517	5.72e-43	CD4+ T cells
NPM1	5.26e-47	0.318955	0.889	0.788	1.14e-42	CD4+ T cells
TANK	7.83e-47	0.52453	0.534	0.406	1.71e-42	CD4+ T cells
TMSB4X	8.35e-47	0.306939	0.996	0.983	1.82e-42	CD4+ T cells
TAP1	1.27e-46	0.474848	0.655	0.524	2.76e-42	CD4+ T cells
ICA1	1.36e-46	0.684898	0.243	0.121	2.97e-42	CD4+ T cells
MSI2	1.48e-46	0.489935	0.482	0.339	3.23e-42	CD4+ T cells
MRPS6	3.92e-46	0.4985	0.587	0.459	8.54e-42	CD4+ T cells
BTG3	7.3e-46	0.574197	0.486	0.35	1.59e-41	CD4+ T cells
LEPROTL1	8.6e-46	0.488258	0.57	0.438	1.87e-41	CD4+ T cells
UBE2D2	1.54e-45	0.44268	0.684	0.584	3.35e-41	CD4+ T cells
HMGN1	2.83e-45	0.378988	0.819	0.722	6.16e-41	CD4+ T cells
STK4	2.87e-45	0.351291	0.758	0.627	6.24e-41	CD4+ T cells
EEF1A1	3.27e-45	0.253206	0.997	0.972	7.12e-41	CD4+ T cells
TRAPPC1	6.03e-45	0.440999	0.662	0.562	1.31e-40	CD4+ T cells
MX1	7.04e-45	0.600868	0.667	0.528	1.53e-40	CD4+ T cells
EZR	1.08e-44	0.449755	0.615	0.483	2.34e-40	CD4+ T cells
NSD3	1.09e-44	0.395284	0.667	0.566	2.37e-40	CD4+ T cells
CEACAM1	1.27e-44	0.287095	0.154	0.057	2.78e-40	CD4+ T cells
2023-09-01	1.35e-44	0.330094	0.472	0.288	2.95e-40	CD4+ T cells
PGAM1	1.86e-44	0.485973	0.652	0.527	4.05e-40	CD4+ T cells
VAMP5	3.28e-44	0.430539	0.531	0.365	7.14e-40	CD4+ T cells
EDF1	4.49e-44	0.36589	0.826	0.748	9.79e-40	CD4+ T cells
DYNLRB1	5.5e-44	0.434118	0.711	0.618	1.2e-39	CD4+ T cells
CCNI	2.44e-43	0.387807	0.812	0.698	5.32e-39	CD4+ T cells
LBH	3.77e-43	0.406368	0.531	0.366	8.22e-39	CD4+ T cells
SH3BGRL	4.86e-43	0.467365	0.66	0.561	1.06e-38	CD4+ T cells
THEM4	1.14e-42	0.476556	0.301	0.17	2.49e-38	CD4+ T cells
APOBEC3C	1.27e-42	0.430327	0.537	0.383	2.76e-38	CD4+ T cells
MIR3142HG	1.39e-42	0.285963	0.12	0.038	3.04e-38	CD4+ T cells
NCK2	1.58e-42	0.541903	0.398	0.264	3.44e-38	CD4+ T cells
CACYBP	1.64e-42	0.555137	0.568	0.453	3.57e-38	CD4+ T cells
H3F3A	1.85e-42	0.284251	0.967	0.892	4.02e-38	CD4+ T cells
ZBTB38	2.96e-42	0.576137	0.497	0.378	6.44e-38	CD4+ T cells
CDC42	3.97e-42	0.372934	0.84	0.742	8.65e-38	CD4+ T cells
CIB1	4.81e-42	0.359926	0.733	0.632	1.05e-37	CD4+ T cells
POLR3GL	6.09e-42	0.444032	0.463	0.327	1.33e-37	CD4+ T cells
GBP4	9.1e-42	0.384926	0.506	0.335	1.98e-37	CD4+ T cells
PRDX2	9.17e-42	0.393641	0.672	0.51	2e-37	CD4+ T cells
ITGA4	9.37e-42	0.394659	0.457	0.288	2.04e-37	CD4+ T cells
ARHGAP30	1.2e-41	0.309501	0.512	0.331	2.62e-37	CD4+ T cells
FKBP1A	1.42e-41	0.384282	0.661	0.547	3.08e-37	CD4+ T cells
DEF6	1.75e-41	0.372534	0.422	0.265	3.82e-37	CD4+ T cells
STN1	1.9e-41	0.430043	0.304	0.171	4.14e-37	CD4+ T cells
ABRACL	2.81e-41	0.437631	0.601	0.481	6.13e-37	CD4+ T cells
CD58	2.91e-41	0.450565	0.38	0.243	6.35e-37	CD4+ T cells
HNRNPK	4.35e-41	0.344582	0.806	0.726	9.49e-37	CD4+ T cells
FAM53B	4.74e-41	0.43891	0.283	0.154	1.03e-36	CD4+ T cells
CCR5	4.97e-41	0.28667	0.274	0.134	1.08e-36	CD4+ T cells
C3AR1	8.19e-41	0.376631	0.256	0.125	1.78e-36	CD4+ T cells
PRR13	1.42e-40	0.413607	0.64	0.539	3.1e-36	CD4+ T cells
GADD45G	3.58e-40	0.69144	0.318	0.184	7.79e-36	CD4+ T cells
SKP1	3.98e-40	0.322453	0.833	0.715	8.68e-36	CD4+ T cells
TMA7	4.04e-40	0.28982	0.913	0.837	8.81e-36	CD4+ T cells
MPHOSPH8	7.19e-40	0.332501	0.697	0.606	1.57e-35	CD4+ T cells
ENO1	1.67e-39	0.310769	0.855	0.722	3.63e-35	CD4+ T cells
UBE2N	1.85e-39	0.436693	0.546	0.442	4.02e-35	CD4+ T cells
SF3B5	2.27e-39	0.386088	0.656	0.562	4.95e-35	CD4+ T cells
SP110	2.73e-39	0.436441	0.613	0.483	5.94e-35	CD4+ T cells
FYB1	3.86e-39	0.289174	0.718	0.474	8.41e-35	CD4+ T cells
PET100	4.4e-39	0.400804	0.663	0.577	9.58e-35	CD4+ T cells
PSTPIP1	4.49e-39	0.251741	0.406	0.237	9.79e-35	CD4+ T cells
TMBIM4	5.15e-39	0.397096	0.693	0.599	1.12e-34	CD4+ T cells
LAX1	5.47e-39	0.32538	0.205	0.092	1.19e-34	CD4+ T cells
RPL41	7.11e-39	0.252434	0.991	0.971	1.55e-34	CD4+ T cells
EID1	8.56e-39	0.350615	0.735	0.617	1.87e-34	CD4+ T cells
BUB3	1.21e-38	0.382215	0.583	0.464	2.63e-34	CD4+ T cells
PPP1R18	1.38e-38	0.409376	0.545	0.401	3e-34	CD4+ T cells
GCNT1	1.58e-38	0.486688	0.258	0.138	3.45e-34	CD4+ T cells
SNRPN	1.61e-38	0.448303	0.477	0.351	3.5e-34	CD4+ T cells
ACTR3	1.62e-38	0.380369	0.732	0.638	3.53e-34	CD4+ T cells
RPS19	1.79e-38	0.2936	0.99	0.963	3.89e-34	CD4+ T cells
TSPAN5	2.42e-38	0.397683	0.275	0.148	5.26e-34	CD4+ T cells
PHF11	3.06e-38	0.466168	0.489	0.362	6.66e-34	CD4+ T cells
NDUFA3	5.26e-38	0.38374	0.691	0.612	1.15e-33	CD4+ T cells
SRSF5	6.43e-38	0.291133	0.815	0.734	1.4e-33	CD4+ T cells
PSMB3	8.55e-38	0.398214	0.672	0.589	1.86e-33	CD4+ T cells
FAM107B	9.24e-38	0.419744	0.585	0.465	2.01e-33	CD4+ T cells
LDHB	1.09e-37	0.390925	0.694	0.574	2.37e-33	CD4+ T cells
VDR	2.47e-37	0.452747	0.221	0.113	5.38e-33	CD4+ T cells
GYPC	2.84e-37	0.41773	0.572	0.437	6.18e-33	CD4+ T cells
PSMC5	4.43e-37	0.439036	0.558	0.464	9.65e-33	CD4+ T cells
BTF3	5.07e-37	0.317226	0.878	0.774	1.1e-32	CD4+ T cells
ARHGEF6	5.63e-37	0.323237	0.318	0.18	1.23e-32	CD4+ T cells
KLHDC7B	7.36e-37	0.307439	0.178	0.076	1.6e-32	CD4+ T cells
UBXN1	2.09e-36	0.366204	0.658	0.572	4.55e-32	CD4+ T cells
SNU13	3.18e-36	0.377538	0.685	0.607	6.93e-32	CD4+ T cells
PFDN5	3.21e-36	0.287778	0.92	0.827	7e-32	CD4+ T cells
COX7A2	4.71e-36	0.316442	0.81	0.697	1.03e-31	CD4+ T cells
CHST7	6.19e-36	0.282824	0.143	0.057	1.35e-31	CD4+ T cells
NDUFA6	6.32e-36	0.441281	0.566	0.476	1.38e-31	CD4+ T cells
PRKCH	7.58e-36	0.291516	0.426	0.264	1.65e-31	CD4+ T cells
ANKRD12	7.58e-36	0.255245	0.778	0.683	1.65e-31	CD4+ T cells
COL9A2	8.02e-36	0.355403	0.195	0.094	1.75e-31	CD4+ T cells
UBL5	1.12e-35	0.286682	0.885	0.78	2.44e-31	CD4+ T cells
ELF1	1.22e-35	0.448723	0.579	0.471	2.67e-31	CD4+ T cells
CD82	1.79e-35	0.447466	0.501	0.371	3.9e-31	CD4+ T cells
NDUFA13	2.97e-35	0.344332	0.74	0.655	6.47e-31	CD4+ T cells
TOP1	4.38e-35	0.442035	0.648	0.575	9.55e-31	CD4+ T cells
NINJ2	5.4e-35	0.340291	0.18	0.082	1.18e-30	CD4+ T cells
CUTA	6.12e-35	0.402788	0.651	0.558	1.33e-30	CD4+ T cells
CHMP4A	7.02e-35	0.36726	0.608	0.524	1.53e-30	CD4+ T cells
PSME1	1.05e-34	0.292331	0.819	0.731	2.28e-30	CD4+ T cells
TMEM140	1.38e-34	0.389875	0.29	0.166	3e-30	CD4+ T cells
EIF3H	2.8e-34	0.363699	0.691	0.591	6.11e-30	CD4+ T cells
CCNDBP1	3.22e-34	0.432559	0.458	0.339	7.02e-30	CD4+ T cells
PPP1CA	4.15e-34	0.355737	0.67	0.574	9.05e-30	CD4+ T cells
FAM46C	4.68e-34	0.360115	0.339	0.201	1.02e-29	CD4+ T cells
JUNB	4.93e-34	0.471211	0.882	0.774	1.07e-29	CD4+ T cells
TESPA1	5.24e-34	0.266981	0.21	0.097	1.14e-29	CD4+ T cells
RBM8A	5.28e-34	0.342649	0.681	0.595	1.15e-29	CD4+ T cells
CASK	1.58e-33	0.447739	0.362	0.242	3.44e-29	CD4+ T cells
PAK2	2.28e-33	0.404481	0.615	0.522	4.97e-29	CD4+ T cells
CISD3	3.8e-33	0.474389	0.402	0.293	8.27e-29	CD4+ T cells
CFL1	5.25e-33	0.27808	0.947	0.863	1.14e-28	CD4+ T cells
IPCEF1	6.3e-33	0.258056	0.242	0.121	1.37e-28	CD4+ T cells
NEDD9	7.88e-33	0.41516	0.399	0.267	1.72e-28	CD4+ T cells
GPR82	1.13e-32	0.319748	0.205	0.1	2.45e-28	CD4+ T cells
TXNDC17	1.26e-32	0.432317	0.565	0.477	2.74e-28	CD4+ T cells
PTGIR	1.68e-32	0.271149	0.106	0.038	3.67e-28	CD4+ T cells
N4BP1	2.06e-32	0.397414	0.509	0.402	4.49e-28	CD4+ T cells
RCSD1	2.81e-32	0.330283	0.352	0.215	6.13e-28	CD4+ T cells
C16orf87	5.67e-32	0.461315	0.315	0.208	1.23e-27	CD4+ T cells
UBE2B	6.17e-32	0.388063	0.619	0.534	1.34e-27	CD4+ T cells
ATP5G2	7.29e-32	0.295314	0.839	0.746	1.59e-27	CD4+ T cells
HAPLN3	8.29e-32	0.37419	0.308	0.188	1.81e-27	CD4+ T cells
TBCA	9.32e-32	0.372941	0.675	0.598	2.03e-27	CD4+ T cells
CELF2	1.7e-31	0.286095	0.591	0.435	3.71e-27	CD4+ T cells
NDUFB4	1.72e-31	0.333644	0.697	0.612	3.74e-27	CD4+ T cells
RBX1	1.8e-31	0.34484	0.705	0.63	3.92e-27	CD4+ T cells
SYNGR2	2.01e-31	0.563674	0.5	0.399	4.38e-27	CD4+ T cells
NDUFB1	6.95e-31	0.284191	0.708	0.602	1.51e-26	CD4+ T cells
USP15	1.1e-30	0.345166	0.579	0.473	2.41e-26	CD4+ T cells
JAK3	1.24e-30	0.263453	0.374	0.241	2.71e-26	CD4+ T cells
UBE2I	1.97e-30	0.335168	0.663	0.59	4.28e-26	CD4+ T cells
SAMD9L	2.26e-30	0.271885	0.602	0.473	4.92e-26	CD4+ T cells
MZT2A	2.81e-30	0.322841	0.642	0.544	6.12e-26	CD4+ T cells
ADAT2	3.32e-30	0.309929	0.161	0.074	7.23e-26	CD4+ T cells
FNBP1	3.38e-30	0.321496	0.616	0.514	7.37e-26	CD4+ T cells
PTPRJ	4.43e-30	0.386481	0.33	0.216	9.66e-26	CD4+ T cells
RILPL2	6.09e-30	0.454191	0.36	0.247	1.33e-25	CD4+ T cells
PSMD8	6.4e-30	0.323007	0.653	0.573	1.39e-25	CD4+ T cells
FAM110A	9.85e-30	0.3716	0.214	0.116	2.15e-25	CD4+ T cells
DGKA	9.86e-30	0.262952	0.297	0.173	2.15e-25	CD4+ T cells
LINC00513	1.15e-29	0.358801	0.204	0.105	2.5e-25	CD4+ T cells
ORAI1	1.25e-29	0.394477	0.4	0.286	2.72e-25	CD4+ T cells
ANP32B	1.51e-29	0.314392	0.668	0.569	3.28e-25	CD4+ T cells
FERMT3	1.79e-29	0.28585	0.438	0.294	3.9e-25	CD4+ T cells
ORMDL3	1.97e-29	0.356097	0.322	0.206	4.3e-25	CD4+ T cells
LY6E	2.06e-29	0.295544	0.874	0.759	4.49e-25	CD4+ T cells
SFT2D1	2.07e-29	0.504166	0.478	0.405	4.5e-25	CD4+ T cells
TNIP2	2.12e-29	0.509742	0.36	0.26	4.63e-25	CD4+ T cells
FAM104A	3.71e-29	0.430002	0.339	0.236	8.07e-25	CD4+ T cells
HACD1	3.82e-29	0.337148	0.152	0.071	8.32e-25	CD4+ T cells
ID3	5.68e-29	0.3947	0.36	0.233	1.24e-24	CD4+ T cells
HIGD2A	7.54e-29	0.324795	0.645	0.565	1.64e-24	CD4+ T cells
SELENOT	8.37e-29	0.388464	0.525	0.447	1.82e-24	CD4+ T cells
KCNN4	1.31e-28	0.374177	0.203	0.109	2.85e-24	CD4+ T cells
RPL23	1.47e-28	0.265947	0.928	0.843	3.2e-24	CD4+ T cells
CALM1	1.5e-28	0.252785	0.926	0.852	3.26e-24	CD4+ T cells
GNAI2	1.9e-28	0.277785	0.785	0.69	4.15e-24	CD4+ T cells
OXNAD1	2.09e-28	0.311805	0.393	0.256	4.56e-24	CD4+ T cells
CAP1	2.45e-28	0.327285	0.696	0.63	5.33e-24	CD4+ T cells
TMCO1	3.36e-28	0.406913	0.607	0.547	7.32e-24	CD4+ T cells
SASH3	5.09e-28	0.273832	0.345	0.212	1.11e-23	CD4+ T cells
UBE2D3	5.1e-28	0.256647	0.757	0.687	1.11e-23	CD4+ T cells
COX7A2L	6.22e-28	0.33419	0.601	0.51	1.35e-23	CD4+ T cells
TPM3	6.32e-28	0.299207	0.773	0.706	1.38e-23	CD4+ T cells
SOCS3	6.72e-28	0.434511	0.486	0.369	1.46e-23	CD4+ T cells
BAX	7.42e-28	0.518936	0.574	0.505	1.62e-23	CD4+ T cells
GCHFR	9.19e-28	0.425709	0.322	0.216	2e-23	CD4+ T cells
ARL4C	9.28e-28	0.288135	0.678	0.561	2.02e-23	CD4+ T cells
TMEM258	1.15e-27	0.292834	0.758	0.669	2.5e-23	CD4+ T cells
MEI1	1.74e-27	0.257734	0.185	0.093	3.8e-23	CD4+ T cells
RIC3	2.06e-27	0.338492	0.192	0.099	4.48e-23	CD4+ T cells
TRIM69	2.21e-27	0.428824	0.356	0.255	4.81e-23	CD4+ T cells
CCDC12	4.06e-27	0.335334	0.535	0.452	8.85e-23	CD4+ T cells
RAB8B	4.84e-27	0.34001	0.422	0.301	1.05e-22	CD4+ T cells
AIP	7.41e-27	0.399893	0.531	0.457	1.62e-22	CD4+ T cells
G3BP2	1.33e-26	0.376336	0.555	0.483	2.91e-22	CD4+ T cells
GABPB1	1.44e-26	0.408972	0.448	0.354	3.13e-22	CD4+ T cells
TNFRSF14	1.61e-26	0.369712	0.486	0.395	3.51e-22	CD4+ T cells
TBCB	1.72e-26	0.364524	0.525	0.453	3.76e-22	CD4+ T cells
TSTD1	2.25e-26	0.355215	0.558	0.452	4.91e-22	CD4+ T cells
PSME2	2.52e-26	0.270026	0.792	0.707	5.5e-22	CD4+ T cells
PHF19	4.47e-26	0.286322	0.278	0.168	9.74e-22	CD4+ T cells
RFTN1	5.1e-26	0.338981	0.278	0.174	1.11e-21	CD4+ T cells
NOP53	5.21e-26	0.258467	0.741	0.672	1.14e-21	CD4+ T cells
SAP18	6.84e-26	0.257013	0.758	0.677	1.49e-21	CD4+ T cells
RHOA	1.45e-25	0.256795	0.774	0.691	3.15e-21	CD4+ T cells
HSPA8	1.97e-25	0.258526	0.878	0.793	4.29e-21	CD4+ T cells
TDRD3	2.52e-25	0.36959	0.262	0.165	5.49e-21	CD4+ T cells
MRPL33	3.35e-25	0.316224	0.611	0.53	7.3e-21	CD4+ T cells
ARHGAP25	3.43e-25	0.282464	0.306	0.193	7.48e-21	CD4+ T cells
TRAPPC4	3.93e-25	0.400961	0.435	0.355	8.55e-21	CD4+ T cells
SMCHD1	3.97e-25	0.300206	0.604	0.52	8.66e-21	CD4+ T cells
WAS	4.51e-25	0.252367	0.406	0.274	9.82e-21	CD4+ T cells
CSF1	4.74e-25	0.385026	0.383	0.266	1.03e-20	CD4+ T cells
PMVK	5.25e-25	0.433974	0.389	0.308	1.14e-20	CD4+ T cells
SLC25A3	7.38e-25	0.283071	0.739	0.633	1.61e-20	CD4+ T cells
TMC6	8.13e-25	0.336632	0.471	0.371	1.77e-20	CD4+ T cells
TNFSF12	8.16e-25	0.348355	0.354	0.25	1.78e-20	CD4+ T cells
CDV3	9.16e-25	0.368172	0.608	0.557	2e-20	CD4+ T cells
CHST11	1.11e-24	0.36154	0.365	0.258	2.42e-20	CD4+ T cells
CHMP5	1.55e-24	0.382013	0.545	0.479	3.37e-20	CD4+ T cells
GOLGA8B	1.56e-24	0.345006	0.381	0.268	3.39e-20	CD4+ T cells
PVT1	2.02e-24	0.336449	0.245	0.149	4.39e-20	CD4+ T cells
HNRNPF	2.06e-24	0.280088	0.657	0.584	4.48e-20	CD4+ T cells
COMMD7	2.09e-24	0.36554	0.506	0.43	4.56e-20	CD4+ T cells
NDUFC1	2.48e-24	0.306541	0.624	0.546	5.4e-20	CD4+ T cells
ARID5A	2.57e-24	0.384062	0.371	0.266	5.59e-20	CD4+ T cells
NSA2	3.04e-24	0.348665	0.632	0.582	6.61e-20	CD4+ T cells
SYF2	4.09e-24	0.346501	0.608	0.551	8.92e-20	CD4+ T cells
CXCR4	4.21e-24	0.352942	0.625	0.502	9.17e-20	CD4+ T cells
TULP4	4.29e-24	0.40479	0.324	0.23	9.34e-20	CD4+ T cells
GPBP1	4.89e-24	0.28322	0.632	0.577	1.07e-19	CD4+ T cells
SNRPB2	5.07e-24	0.312827	0.591	0.531	1.1e-19	CD4+ T cells
ECH1	5.42e-24	0.350228	0.528	0.465	1.18e-19	CD4+ T cells
ARPC5L	6e-24	0.290487	0.57	0.497	1.31e-19	CD4+ T cells
PPP1R7	6.22e-24	0.374334	0.465	0.394	1.35e-19	CD4+ T cells
ODF2L	1.05e-23	0.319958	0.531	0.442	2.28e-19	CD4+ T cells
NDFIP2	1.22e-23	0.366296	0.353	0.252	2.66e-19	CD4+ T cells
KMT2E	1.43e-23	0.260349	0.668	0.611	3.11e-19	CD4+ T cells
SQOR	1.52e-23	0.345712	0.398	0.303	3.3e-19	CD4+ T cells
IKBKE	2.1e-23	0.327487	0.232	0.141	4.58e-19	CD4+ T cells
PKM	2.51e-23	0.383778	0.743	0.646	5.47e-19	CD4+ T cells
PPP1R2	2.61e-23	0.356213	0.557	0.493	5.69e-19	CD4+ T cells
SELENOK	3.12e-23	0.33025	0.631	0.564	6.79e-19	CD4+ T cells
SCAND1	4.02e-23	0.345036	0.598	0.536	8.75e-19	CD4+ T cells
APOLD1	4.08e-23	0.305613	0.167	0.086	8.88e-19	CD4+ T cells
ANKRD22	5.24e-23	0.303124	0.119	0.053	1.14e-18	CD4+ T cells
VAMP2	6.45e-23	0.307572	0.596	0.531	1.4e-18	CD4+ T cells
SRSF3	1.15e-22	0.250073	0.772	0.702	2.5e-18	CD4+ T cells
MOB3A	1.84e-22	0.305127	0.322	0.221	4.01e-18	CD4+ T cells
IGFLR1	2.24e-22	0.263314	0.177	0.095	4.89e-18	CD4+ T cells
NR3C1	2.68e-22	0.40255	0.52	0.451	5.85e-18	CD4+ T cells
FAM96B	3.03e-22	0.302364	0.595	0.543	6.61e-18	CD4+ T cells
IFI44	3.11e-22	0.309934	0.551	0.471	6.77e-18	CD4+ T cells
TSPYL2	3.29e-22	0.309229	0.373	0.265	7.16e-18	CD4+ T cells
OPTN	3.39e-22	0.296004	0.542	0.457	7.38e-18	CD4+ T cells
L3MBTL3	3.52e-22	0.258567	0.15	0.075	7.67e-18	CD4+ T cells
PSIP1	5.05e-22	0.311887	0.496	0.398	1.1e-17	CD4+ T cells
ANP32A	5.82e-22	0.312968	0.553	0.496	1.27e-17	CD4+ T cells
MAT2B	7.23e-22	0.373999	0.422	0.343	1.57e-17	CD4+ T cells
MICAL2	8.05e-22	0.329572	0.246	0.156	1.75e-17	CD4+ T cells
RCAN3	1.07e-21	0.335628	0.349	0.248	2.34e-17	CD4+ T cells
MYCBP2	1.16e-21	0.304205	0.593	0.529	2.53e-17	CD4+ T cells
PSMA2	1.26e-21	0.312987	0.581	0.515	2.75e-17	CD4+ T cells
GNA15	1.37e-21	0.307313	0.176	0.098	2.98e-17	CD4+ T cells
GABARAPL2	1.43e-21	0.287129	0.564	0.499	3.11e-17	CD4+ T cells
SS18L2	1.91e-21	0.379412	0.424	0.35	4.15e-17	CD4+ T cells
ANXA6	1.92e-21	0.313523	0.521	0.426	4.19e-17	CD4+ T cells
PTPN1	2.42e-21	0.42878	0.43	0.362	5.27e-17	CD4+ T cells
OTUD5	3.52e-21	0.50206	0.339	0.262	7.66e-17	CD4+ T cells
CCDC88C	5.59e-21	0.258638	0.345	0.243	1.22e-16	CD4+ T cells
IFI35	7.75e-21	0.37814	0.476	0.391	1.69e-16	CD4+ T cells
SLC41A1	7.88e-21	0.298373	0.182	0.106	1.72e-16	CD4+ T cells
SERBP1	7.95e-21	0.252793	0.767	0.69	1.73e-16	CD4+ T cells
CASP4	9.23e-21	0.323203	0.561	0.503	2.01e-16	CD4+ T cells
CLTB	1.16e-20	0.336248	0.48	0.416	2.52e-16	CD4+ T cells
CNBP	1.33e-20	0.275893	0.652	0.601	2.9e-16	CD4+ T cells
ERI1	1.4e-20	0.326046	0.192	0.113	3.04e-16	CD4+ T cells
VCP	1.98e-20	0.330406	0.537	0.49	4.31e-16	CD4+ T cells
CAB39	2.09e-20	0.374972	0.416	0.346	4.54e-16	CD4+ T cells
HIVEP3	2.46e-20	0.31777	0.203	0.12	5.36e-16	CD4+ T cells
PDE4B	3.91e-20	0.319007	0.323	0.221	8.51e-16	CD4+ T cells
DDHD1	4.4e-20	0.357554	0.394	0.305	9.6e-16	CD4+ T cells
RTF1	4.73e-20	0.261982	0.576	0.523	1.03e-15	CD4+ T cells
NCOA3	5.94e-20	0.459305	0.414	0.349	1.29e-15	CD4+ T cells
MFHAS1	6.36e-20	0.344069	0.243	0.161	1.39e-15	CD4+ T cells
DENND2D	6.62e-20	0.25014	0.368	0.267	1.44e-15	CD4+ T cells
PSMB6	7.42e-20	0.282228	0.566	0.509	1.62e-15	CD4+ T cells
HOXB2	7.99e-20	0.343429	0.323	0.232	1.74e-15	CD4+ T cells
RTRAF	9.07e-20	0.275094	0.613	0.551	1.98e-15	CD4+ T cells
ZBTB7B	9.21e-20	0.330593	0.241	0.161	2.01e-15	CD4+ T cells
RNF19A	9.49e-20	0.290943	0.519	0.446	2.07e-15	CD4+ T cells
DYNC1I2	1.12e-19	0.44409	0.52	0.476	2.43e-15	CD4+ T cells
PLP2	1.35e-19	0.319303	0.572	0.504	2.93e-15	CD4+ T cells
GRK6	1.74e-19	0.345849	0.315	0.228	3.79e-15	CD4+ T cells
UBE2L6	1.75e-19	0.355375	0.546	0.488	3.81e-15	CD4+ T cells
IDS	1.93e-19	0.321398	0.585	0.529	4.2e-15	CD4+ T cells
ZNRD1	3.56e-19	0.353708	0.43	0.367	7.75e-15	CD4+ T cells
KIF2A	3.67e-19	0.350749	0.391	0.312	7.99e-15	CD4+ T cells
NECAP2	4.83e-19	0.366352	0.428	0.363	1.05e-14	CD4+ T cells
CBX3	7.39e-19	0.276736	0.666	0.602	1.61e-14	CD4+ T cells
C21orf91	1.24e-18	0.392827	0.27	0.187	2.7e-14	CD4+ T cells
CDIP1	1.59e-18	0.28643	0.19	0.114	3.47e-14	CD4+ T cells
LRRC61	1.74e-18	0.348988	0.207	0.133	3.79e-14	CD4+ T cells
HNRNPH3	2.01e-18	0.301173	0.554	0.512	4.38e-14	CD4+ T cells
THRAP3	2.41e-18	0.290853	0.578	0.532	5.26e-14	CD4+ T cells
PIN1	3.58e-18	0.331395	0.457	0.398	7.8e-14	CD4+ T cells
LAMTOR4	4.02e-18	0.259406	0.654	0.593	8.76e-14	CD4+ T cells
MPC2	4.34e-18	0.300903	0.482	0.422	9.45e-14	CD4+ T cells
MAPKAPK3	4.55e-18	0.328383	0.299	0.219	9.92e-14	CD4+ T cells
ZNF292	4.64e-18	0.316658	0.521	0.472	1.01e-13	CD4+ T cells
HIST1H2BN	5.71e-18	0.267352	0.213	0.132	1.24e-13	CD4+ T cells
PSMD7	6.61e-18	0.3094	0.509	0.458	1.44e-13	CD4+ T cells
CCDC32	8e-18	0.383372	0.309	0.237	1.74e-13	CD4+ T cells
MDFIC	1.18e-17	0.296576	0.396	0.307	2.57e-13	CD4+ T cells
CCM2	1.41e-17	0.328054	0.419	0.356	3.07e-13	CD4+ T cells
NME3	1.83e-17	0.325921	0.484	0.431	3.98e-13	CD4+ T cells
POLR2K	1.91e-17	0.268921	0.533	0.48	4.17e-13	CD4+ T cells
MAP2K3	2.14e-17	0.412585	0.35	0.283	4.66e-13	CD4+ T cells
COPZ1	2.31e-17	0.324059	0.489	0.445	5.02e-13	CD4+ T cells
COMMD3	2.72e-17	0.404142	0.409	0.363	5.93e-13	CD4+ T cells
LSM6	2.84e-17	0.325495	0.437	0.381	6.19e-13	CD4+ T cells
DESI1	3.71e-17	0.398098	0.328	0.264	8.08e-13	CD4+ T cells
CCDC107	4.2e-17	0.305326	0.498	0.444	9.15e-13	CD4+ T cells
YPEL3	4.47e-17	0.300624	0.514	0.458	9.74e-13	CD4+ T cells
HNRNPM	5.39e-17	0.283102	0.612	0.568	1.17e-12	CD4+ T cells
REX1BD	7.1e-17	0.270368	0.547	0.505	1.55e-12	CD4+ T cells
CASP8	1.11e-16	0.295556	0.419	0.35	2.41e-12	CD4+ T cells
ZCCHC2	1.36e-16	0.300628	0.314	0.234	2.97e-12	CD4+ T cells
C17orf62	1.55e-16	0.303948	0.46	0.402	3.38e-12	CD4+ T cells
PMF1	1.73e-16	0.348905	0.397	0.337	3.77e-12	CD4+ T cells
METTL8	2.67e-16	0.345374	0.228	0.156	5.82e-12	CD4+ T cells
UXS1	2.69e-16	0.37978	0.277	0.21	5.86e-12	CD4+ T cells
CCDC91	4.09e-16	0.317232	0.362	0.294	8.91e-12	CD4+ T cells
GTF2A2	4.39e-16	0.290517	0.501	0.46	9.56e-12	CD4+ T cells
ANXA7	6.98e-16	0.307325	0.45	0.41	1.52e-11	CD4+ T cells
DYNLT1	7.33e-16	0.273324	0.574	0.533	1.6e-11	CD4+ T cells
TNIP1	7.54e-16	0.356011	0.382	0.327	1.64e-11	CD4+ T cells
DNAJC8	1.33e-15	0.27101	0.574	0.537	2.91e-11	CD4+ T cells
RNF167	1.49e-15	0.328468	0.377	0.314	3.24e-11	CD4+ T cells
PPM1K	2.02e-15	0.29273	0.41	0.336	4.41e-11	CD4+ T cells
PHPT1	2.18e-15	0.306067	0.591	0.555	4.75e-11	CD4+ T cells
EXOSC1	2.56e-15	0.313974	0.366	0.307	5.58e-11	CD4+ T cells
C19orf24	2.56e-15	0.329976	0.45	0.405	5.58e-11	CD4+ T cells
LIMA1	2.64e-15	0.36295	0.329	0.262	5.76e-11	CD4+ T cells
HNRNPLL	3.96e-15	0.374445	0.29	0.225	8.63e-11	CD4+ T cells
ZNRF2	4.2e-15	0.316762	0.301	0.235	9.16e-11	CD4+ T cells
ARPC4	4.58e-15	0.25526	0.567	0.533	9.98e-11	CD4+ T cells
RPA3	5.26e-15	0.279022	0.411	0.351	1.15e-10	CD4+ T cells
NMT2	8.86e-15	0.282529	0.243	0.168	1.93e-10	CD4+ T cells
USP18	9.28e-15	0.316633	0.318	0.243	2.02e-10	CD4+ T cells
ZBTB24	9.35e-15	0.288916	0.22	0.151	2.04e-10	CD4+ T cells
MKNK2	1.11e-14	0.332233	0.368	0.309	2.43e-10	CD4+ T cells
EPC1	1.12e-14	0.26377	0.5	0.459	2.44e-10	CD4+ T cells
ZDHHC18	1.2e-14	0.306338	0.221	0.152	2.61e-10	CD4+ T cells
SCAMP2	1.25e-14	0.321046	0.439	0.395	2.73e-10	CD4+ T cells
UFC1	1.55e-14	0.289757	0.531	0.503	3.38e-10	CD4+ T cells
MAP1LC3A	1.64e-14	0.346438	0.275	0.207	3.57e-10	CD4+ T cells
GK	1.78e-14	0.256066	0.182	0.116	3.88e-10	CD4+ T cells
RANBP1	2.85e-14	0.283569	0.536	0.486	6.22e-10	CD4+ T cells
SERPINB1	3.19e-14	0.277702	0.512	0.467	6.94e-10	CD4+ T cells
CLIP1	3.64e-14	0.27941	0.414	0.359	7.92e-10	CD4+ T cells
SLC12A6	4.9e-14	0.303252	0.207	0.141	1.07e-09	CD4+ T cells
PCMT1	6.96e-14	0.286705	0.442	0.397	1.52e-09	CD4+ T cells
NOL7	6.97e-14	0.270608	0.551	0.518	1.52e-09	CD4+ T cells
ARID4B	1.83e-13	0.256299	0.586	0.559	3.99e-09	CD4+ T cells
CCNG2	2.1e-13	0.373864	0.283	0.223	4.57e-09	CD4+ T cells
CMC2	4.84e-13	0.275971	0.411	0.362	1.05e-08	CD4+ T cells
NFKB2	6.19e-13	0.3747	0.312	0.255	1.35e-08	CD4+ T cells
SNX9	7.2e-13	0.376696	0.282	0.225	1.57e-08	CD4+ T cells
NUDT5	7.3e-13	0.283429	0.42	0.381	1.59e-08	CD4+ T cells
STAT5B	7.51e-13	0.261319	0.257	0.189	1.64e-08	CD4+ T cells
MBD2	8.63e-13	0.278523	0.482	0.457	1.88e-08	CD4+ T cells
EVI2A	1.02e-12	0.309555	0.306	0.231	2.22e-08	CD4+ T cells
MX2	1.13e-12	0.332606	0.382	0.306	2.46e-08	CD4+ T cells
MAL	1.31e-12	0.387496	0.128	0.075	2.86e-08	CD4+ T cells
IFI27L2	1.84e-12	0.286935	0.516	0.484	4e-08	CD4+ T cells
OTULIN	1.96e-12	0.288744	0.36	0.3	4.27e-08	CD4+ T cells
RNPEPL1	3.51e-12	0.26515	0.411	0.366	7.64e-08	CD4+ T cells
AC016831.5	5.53e-12	0.324571	0.251	0.188	1.2e-07	CD4+ T cells
MAD1L1	5.88e-12	0.275774	0.242	0.18	1.28e-07	CD4+ T cells
WDR1	7.06e-12	0.267125	0.492	0.465	1.54e-07	CD4+ T cells
SIGIRR	8e-12	0.255689	0.4	0.351	1.74e-07	CD4+ T cells
EIF4E3	1.67e-11	0.253491	0.227	0.165	3.63e-07	CD4+ T cells
CLDND1	1.87e-11	0.306317	0.379	0.331	4.08e-07	CD4+ T cells
TAB2	1.94e-11	0.305599	0.31	0.259	4.22e-07	CD4+ T cells
ASXL1	2.66e-11	0.291152	0.313	0.266	5.8e-07	CD4+ T cells
RTP4	3.1e-11	0.262164	0.266	0.207	6.75e-07	CD4+ T cells
CD320	3.47e-11	0.305819	0.296	0.242	7.55e-07	CD4+ T cells
VOPP1	3.96e-11	0.306989	0.394	0.355	8.63e-07	CD4+ T cells
TOB1	4.32e-11	0.275668	0.347	0.295	9.41e-07	CD4+ T cells
EMC7	4.73e-11	0.271722	0.438	0.413	1.03e-06	CD4+ T cells
EED	4.88e-11	0.326861	0.275	0.223	1.06e-06	CD4+ T cells
SMAP1	6.35e-11	0.305585	0.395	0.362	1.38e-06	CD4+ T cells
CBFB	6.45e-11	0.329522	0.298	0.247	1.41e-06	CD4+ T cells
NSMCE3	6.69e-11	0.28917	0.354	0.306	1.46e-06	CD4+ T cells
TPP1	6.96e-11	0.286261	0.393	0.345	1.52e-06	CD4+ T cells
TNFAIP8	1.03e-10	0.283527	0.426	0.37	2.24e-06	CD4+ T cells
AIMP1	1.1e-10	0.294273	0.422	0.397	2.39e-06	CD4+ T cells
KIAA0040	1.34e-10	0.317654	0.283	0.229	2.92e-06	CD4+ T cells
EMC6	1.74e-10	0.271733	0.392	0.363	3.79e-06	CD4+ T cells
PELI1	2.08e-10	0.345623	0.218	0.169	4.53e-06	CD4+ T cells
STAT5A	2.67e-10	0.27389	0.223	0.167	5.81e-06	CD4+ T cells
IDI1	6.4e-10	0.281104	0.376	0.332	1.39e-05	CD4+ T cells
NT5C3A	6.89e-10	0.32188	0.376	0.335	1.5e-05	CD4+ T cells
MIIP	1.13e-09	0.27878	0.249	0.201	2.46e-05	CD4+ T cells
CCDC71L	1.17e-09	0.26135	0.264	0.215	2.56e-05	CD4+ T cells
INPP5F	1.21e-09	0.331738	0.182	0.133	2.63e-05	CD4+ T cells
IRF2	1.38e-09	0.256209	0.413	0.38	3.01e-05	CD4+ T cells
SLC35D2	1.91e-09	0.255912	0.234	0.183	4.17e-05	CD4+ T cells
THADA	2.16e-09	0.417072	0.223	0.178	4.71e-05	CD4+ T cells
ELOVL5	2.68e-09	0.27016	0.314	0.27	5.84e-05	CD4+ T cells
TMEM9B	2.96e-09	0.265306	0.343	0.307	6.45e-05	CD4+ T cells
SDF4	3.1e-09	0.274943	0.442	0.431	6.74e-05	CD4+ T cells
HERC6	3.12e-09	0.254024	0.252	0.2	6.8e-05	CD4+ T cells
NFAT5	3.2e-09	0.26053	0.397	0.362	6.96e-05	CD4+ T cells
ZC3H7A	3.58e-09	0.270559	0.285	0.242	7.8e-05	CD4+ T cells
ODC1	3.63e-09	0.302002	0.36	0.321	7.91e-05	CD4+ T cells
PRDM2	3.67e-09	0.273972	0.401	0.374	8e-05	CD4+ T cells
IL1R1	3.77e-09	0.289767	0.211	0.16	8.22e-05	CD4+ T cells
PTP4A3	4.08e-09	0.372401	0.205	0.157	8.89e-05	CD4+ T cells
ZC2HC1A	5.08e-09	0.415371	0.19	0.148	0.000110579	CD4+ T cells
MESD	5.78e-09	0.315222	0.447	0.442	0.000125956	CD4+ T cells
GALNT10	7.16e-09	0.278425	0.231	0.184	0.000156062	CD4+ T cells
DNAJA2	8.43e-09	0.295355	0.401	0.384	0.000183694	CD4+ T cells
TRAF3	1.01e-08	0.276892	0.231	0.186	0.000220635	CD4+ T cells
IFIH1	1.07e-08	0.251328	0.328	0.282	0.000233148	CD4+ T cells
MAN1A2	1.18e-08	0.334067	0.355	0.332	0.000258032	CD4+ T cells
EAPP	2.21e-08	0.279529	0.37	0.35	0.000482262	CD4+ T cells
FAM173A	2.32e-08	0.302078	0.377	0.361	0.000506476	CD4+ T cells
UNC119	2.38e-08	0.295325	0.215	0.175	0.000517984	CD4+ T cells
RNF187	2.58e-08	0.276704	0.369	0.343	0.000561845	CD4+ T cells
RNF145	2.66e-08	0.25479	0.363	0.334	0.000579828	CD4+ T cells
GTF2B	3.11e-08	0.27718	0.316	0.286	0.000678233	CD4+ T cells
SGPP1	4.64e-08	0.253295	0.153	0.111	0.00101142	CD4+ T cells
JOSD1	5.18e-08	0.278838	0.336	0.305	0.0011293	CD4+ T cells
BCL2L1	5.71e-08	0.378204	0.304	0.276	0.00124352	CD4+ T cells
SOX4	5.72e-08	0.643096	0.353	0.308	0.00124634	CD4+ T cells
RHBDD2	5.85e-08	0.276541	0.251	0.213	0.00127548	CD4+ T cells
CLPP	8.07e-08	0.289313	0.356	0.338	0.00175832	CD4+ T cells
TFRC	9.43e-08	0.264229	0.32	0.282	0.00205337	CD4+ T cells
MED4	1.59e-07	0.289739	0.382	0.371	0.00346807	CD4+ T cells
SNRNP35	1.84e-07	0.268042	0.278	0.245	0.00401593	CD4+ T cells
SNX5	2.3e-07	0.269905	0.398	0.391	0.00501181	CD4+ T cells
PSMD11	2.31e-07	0.259503	0.376	0.367	0.00502429	CD4+ T cells
CCDC167	2.43e-07	0.264275	0.345	0.322	0.00528529	CD4+ T cells
IGBP1	2.46e-07	0.29226	0.367	0.355	0.00536733	CD4+ T cells
IL4R	2.52e-07	0.271028	0.239	0.198	0.00548243	CD4+ T cells
FRMD4B	2.55e-07	0.32831	0.315	0.281	0.00554722	CD4+ T cells
FOXN3	2.7e-07	0.267126	0.374	0.352	0.00587154	CD4+ T cells
MALT1	3.66e-07	0.284378	0.267	0.235	0.00797989	CD4+ T cells
AKIP1	4.85e-07	0.259173	0.2	0.164	0.0105562	CD4+ T cells
STX8	5.41e-07	0.272102	0.306	0.28	0.0117843	CD4+ T cells
COMMD4	9.04e-07	0.252121	0.343	0.327	0.0196937	CD4+ T cells
LSM10	1.34e-06	0.260468	0.372	0.365	0.029279	CD4+ T cells
MT1X	1.75e-06	0.488404	0.426	0.396	0.0380846	CD4+ T cells
ZC3H8	2.73e-06	0.2596	0.235	0.2	0.0593719	CD4+ T cells
USP12	3.51e-06	0.264529	0.22	0.187	0.0764882	CD4+ T cells
ETHE1	4.02e-06	0.265258	0.306	0.288	0.0875118	CD4+ T cells
PDGFA	6.33e-06	0.268177	0.141	0.108	0.13787	CD4+ T cells
DPYSL2	9.04e-06	0.349333	0.283	0.26	0.196989	CD4+ T cells
SAR1B	9.83e-06	0.269526	0.355	0.355	0.214166	CD4+ T cells
SRA1	1e-05	0.290386	0.351	0.351	0.218568	CD4+ T cells
MIR155HG	1.03e-05	0.368129	0.187	0.147	0.225006	CD4+ T cells
SUPT4H1	1.3e-05	0.270123	0.369	0.369	0.282576	CD4+ T cells
REL	1.38e-05	0.398849	0.43	0.413	0.301144	CD4+ T cells
FRG1	2.33e-05	0.256479	0.376	0.377	0.507295	CD4+ T cells
ACSL4	7.36e-05	0.278703	0.27	0.255	1	CD4+ T cells
RAB9A	0.000216323	0.292227	0.275	0.267	1	CD4+ T cells
CREB3L2	0.000524148	0.265744	0.3	0.3	1	CD4+ T cells
CNIH1	0.000561607	0.250764	0.311	0.315	1	CD4+ T cells
CISD2	0.000628948	0.261086	0.336	0.348	1	CD4+ T cells
RELB	0.000861075	0.283915	0.219	0.204	1	CD4+ T cells
AKIRIN2	0.00142068	0.260445	0.26	0.254	1	CD4+ T cells
SLC16A1	0.00222307	0.296541	0.191	0.178	1	CD4+ T cells
IFNAR2	0.00236052	0.250613	0.275	0.275	1	CD4+ T cells
GOLGA8A	0.00252715	0.271388	0.26	0.24	1	CD4+ T cells
WFDC2	0	4.53087	0.962	0.383	0	Epithelial cells
SLPI	0	3.8096	0.864	0.185	0	Epithelial cells
KRT18	0	3.42907	0.936	0.215	0	Epithelial cells
CLDN3	0	3.13948	0.866	0.114	0	Epithelial cells
IGF2	0	3.00478	0.289	0.088	0	Epithelial cells
KRT8	0	2.9503	0.91	0.165	0	Epithelial cells
KRT19	0	2.89826	0.866	0.103	0	Epithelial cells
MMP7	0	2.81905	0.564	0.068	0	Epithelial cells
EPCAM	0	2.80382	0.855	0.096	0	Epithelial cells
CLDN4	0	2.79197	0.837	0.146	0	Epithelial cells
ELF3	0	2.68811	0.837	0.102	0	Epithelial cells
CD24	0	2.58472	0.846	0.121	0	Epithelial cells
CLU	0	2.57163	0.789	0.178	0	Epithelial cells
SCGB2A1	0	2.52773	0.508	0.04	0	Epithelial cells
MUC1	0	2.52685	0.801	0.142	0	Epithelial cells
KRT7	0	2.49613	0.833	0.077	0	Epithelial cells
TFF3	0	2.47078	0.323	0.037	0	Epithelial cells
CRYAB	0	2.45541	0.616	0.1	0	Epithelial cells
SPINT2	0	2.42893	0.864	0.229	0	Epithelial cells
S100A1	0	2.32637	0.723	0.063	0	Epithelial cells
LCN2	0	2.19726	0.631	0.052	0	Epithelial cells
S100A13	0	2.18647	0.87	0.196	0	Epithelial cells
CD9	0	2.18568	0.85	0.289	0	Epithelial cells
GSTP1	0	2.17458	0.936	0.631	0	Epithelial cells
TACSTD2	0	2.1323	0.712	0.117	0	Epithelial cells
IGFBP2	0	2.12594	0.825	0.253	0	Epithelial cells
BCAM	0	2.08259	0.765	0.097	0	Epithelial cells
MAL2	0	2.0598	0.83	0.058	0	Epithelial cells
DAPL1	0	2.04439	0.531	0.063	0	Epithelial cells
HSPB1	0	1.99387	0.942	0.543	0	Epithelial cells
SST	0	1.96647	0.245	0.019	0	Epithelial cells
CLDN7	0	1.96597	0.779	0.085	0	Epithelial cells
LAPTM4B	0	1.95024	0.787	0.137	0	Epithelial cells
DSP	0	1.76488	0.761	0.046	0	Epithelial cells
CRABP2	0	1.75151	0.745	0.099	0	Epithelial cells
DEFB1	0	1.72511	0.555	0.051	0	Epithelial cells
CP	0	1.70891	0.648	0.043	0	Epithelial cells
SLC40A1	0	1.69548	0.637	0.104	0	Epithelial cells
MDK	0	1.68202	0.75	0.17	0	Epithelial cells
RPL8	0	1.65994	0.983	0.921	0	Epithelial cells
C1orf186	0	1.6412	0.619	0.058	0	Epithelial cells
SOX41	0	1.6104	0.75	0.21	0	Epithelial cells
PPDPF	0	1.56244	0.884	0.663	0	Epithelial cells
IFI27	0	1.55971	0.934	0.5	0	Epithelial cells
FOLR1	0	1.54344	0.68	0.034	0	Epithelial cells
SLC34A2	0	1.53797	0.568	0.063	0	Epithelial cells
TNFAIP2	0	1.5262	0.67	0.201	0	Epithelial cells
KLK7	0	1.52223	0.574	0.04	0	Epithelial cells
MSLN	0	1.52171	0.622	0.06	0	Epithelial cells
C2orf88	0	1.50573	0.509	0.043	0	Epithelial cells
ATF3	0	1.50265	0.704	0.278	0	Epithelial cells
GNAS	0	1.49724	0.948	0.848	0	Epithelial cells
SDC4	0	1.49686	0.722	0.123	0	Epithelial cells
CHI3L1	0	1.48732	0.548	0.059	0	Epithelial cells
MT1G	0	1.48375	0.459	0.11	0	Epithelial cells
TM4SF1	0	1.44949	0.654	0.113	0	Epithelial cells
TCIM	0	1.44647	0.414	0.052	0	Epithelial cells
FTH1	0	1.4408	0.988	0.936	0	Epithelial cells
SELENOP	0	1.40497	0.63	0.109	0	Epithelial cells
HILPDA	0	1.40187	0.555	0.105	0	Epithelial cells
KRT17	0	1.3978	0.338	0.03	0	Epithelial cells
S100A6	0	1.39723	0.954	0.862	0	Epithelial cells
PERP	0	1.37732	0.721	0.1	0	Epithelial cells
SCGB1D2	0	1.37431	0.352	0.016	0	Epithelial cells
C19orf33	0	1.35485	0.681	0.032	0	Epithelial cells
IFITM3	0	1.3532	0.921	0.471	0	Epithelial cells
TPI1	0	1.34055	0.889	0.641	0	Epithelial cells
MUC16	0	1.32826	0.555	0.04	0	Epithelial cells
ADIRF	0	1.31337	0.465	0.067	0	Epithelial cells
QPRT	0	1.29892	0.682	0.127	0	Epithelial cells
PRDX5	0	1.294	0.865	0.565	0	Epithelial cells
PCBD1	0	1.29157	0.781	0.25	0	Epithelial cells
CRIP2	0	1.28941	0.71	0.111	0	Epithelial cells
SOX17	0	1.28538	0.632	0.039	0	Epithelial cells
SNCG	0	1.2833	0.362	0.05	0	Epithelial cells
PDZK1IP1	0	1.28072	0.533	0.028	0	Epithelial cells
YBX3	0	1.27092	0.823	0.287	0	Epithelial cells
AC007906.2	0	1.26519	0.469	0.023	0	Epithelial cells
NDUFC2	0	1.25899	0.842	0.557	0	Epithelial cells
ALDOA	0	1.25544	0.928	0.728	0	Epithelial cells
TNNT1	0	1.25507	0.649	0.028	0	Epithelial cells
PPA1	0	1.25397	0.837	0.433	0	Epithelial cells
MT1E	0	1.25034	0.642	0.319	0	Epithelial cells
PPP1R14B	0	1.24954	0.838	0.446	0	Epithelial cells
RBP1	0	1.24722	0.727	0.121	0	Epithelial cells
GAPDH	0	1.2373	0.972	0.892	0	Epithelial cells
DMKN	0	1.23506	0.69	0.044	0	Epithelial cells
BCAT1	0	1.23099	0.594	0.165	0	Epithelial cells
SLC39A4	0	1.22979	0.716	0.117	0	Epithelial cells
BNIP3	0	1.22902	0.743	0.194	0	Epithelial cells
ITGB8	0	1.21648	0.601	0.034	0	Epithelial cells
CYR61	0	1.19615	0.629	0.127	0	Epithelial cells
MFGE8	0	1.19237	0.675	0.151	0	Epithelial cells
S100A14	0	1.18652	0.603	0.031	0	Epithelial cells
MAP3K13	0	1.17883	0.757	0.203	0	Epithelial cells
SMIM22	0	1.17804	0.459	0.028	0	Epithelial cells
TSC22D1	0	1.17713	0.757	0.213	0	Epithelial cells
ID4	0	1.17103	0.596	0.038	0	Epithelial cells
DHCR24	0	1.16885	0.603	0.064	0	Epithelial cells
NDUFB9	0	1.16334	0.814	0.386	0	Epithelial cells
PTPRF	0	1.15733	0.7	0.062	0	Epithelial cells
S100A16	0	1.15283	0.742	0.117	0	Epithelial cells
PGRMC1	0	1.15281	0.754	0.217	0	Epithelial cells
NR2F6	0	1.14986	0.732	0.099	0	Epithelial cells
CTGF	0	1.14724	0.483	0.099	0	Epithelial cells
NUPR1	0	1.14437	0.704	0.201	0	Epithelial cells
ANXA3	0	1.13639	0.606	0.019	0	Epithelial cells
EGR1	0	1.13419	0.736	0.332	0	Epithelial cells
HSPE1	0	1.13287	0.902	0.669	0	Epithelial cells
CST1	0	1.13044	0.182	0.008	0	Epithelial cells
APOA1	0	1.12806	0.393	0.037	0	Epithelial cells
TAGLN	0	1.11953	0.568	0.14	0	Epithelial cells
CYP1B1	0	1.11922	0.452	0.034	0	Epithelial cells
KCNK15	0	1.11731	0.591	0.012	0	Epithelial cells
ABHD11	0	1.1162	0.704	0.094	0	Epithelial cells
CYC1	0	1.11542	0.794	0.336	0	Epithelial cells
SPINT1	0	1.11429	0.668	0.08	0	Epithelial cells
EMX2	0	1.11145	0.645	0.043	0	Epithelial cells
CKB	0	1.1113	0.639	0.055	0	Epithelial cells
SPON1	0	1.11123	0.374	0.09	0	Epithelial cells
PPP1R16A	0	1.1087	0.704	0.079	0	Epithelial cells
ASS1	0	1.10832	0.647	0.057	0	Epithelial cells
ASRGL1	0	1.10542	0.552	0.056	0	Epithelial cells
HSP90AB1	0	1.10396	0.939	0.79	0	Epithelial cells
ZNF503	0	1.10205	0.615	0.1	0	Epithelial cells
TXN	0	1.10113	0.876	0.609	0	Epithelial cells
FAM213A	0	1.10028	0.673	0.09	0	Epithelial cells
PRKCI	0	1.09325	0.677	0.119	0	Epithelial cells
BEX3	0	1.09214	0.713	0.181	0	Epithelial cells
BACE2	0	1.08829	0.632	0.084	0	Epithelial cells
PAX8	0	1.08545	0.662	0.049	0	Epithelial cells
PRDX6	0	1.08398	0.846	0.495	0	Epithelial cells
HP	0	1.07868	0.213	0.022	0	Epithelial cells
LYPD1	0	1.07787	0.483	0.02	0	Epithelial cells
DDR1	0	1.07492	0.688	0.043	0	Epithelial cells
FXYD3	0	1.07405	0.63	0.03	0	Epithelial cells
LSR	0	1.07232	0.708	0.08	0	Epithelial cells
MIF	0	1.06997	0.827	0.477	0	Epithelial cells
C14orf2	0	1.06944	0.856	0.622	0	Epithelial cells
ATP1B1	0	1.0685	0.671	0.149	0	Epithelial cells
DSTN	0	1.06021	0.841	0.402	0	Epithelial cells
PRDX21	0	1.05754	0.832	0.446	0	Epithelial cells
MYL9	0	1.05058	0.743	0.144	0	Epithelial cells
DSG2	0	1.04645	0.644	0.049	0	Epithelial cells
CFB	0	1.04228	0.533	0.052	0	Epithelial cells
MYL6B	0	1.04066	0.73	0.222	0	Epithelial cells
UQCRQ	0	1.03718	0.843	0.56	0	Epithelial cells
HSPD1	0	1.02641	0.856	0.518	0	Epithelial cells
HES1	0	1.02593	0.523	0.096	0	Epithelial cells
TMEM205	0	1.01541	0.735	0.28	0	Epithelial cells
ERP27	0	1.01325	0.416	0.02	0	Epithelial cells
COX6C	0	1.01282	0.901	0.745	0	Epithelial cells
APLP2	0	1.01165	0.789	0.371	0	Epithelial cells
SAA1	0	1.00946	0.229	0.029	0	Epithelial cells
MEIS1	0	1.00928	0.663	0.052	0	Epithelial cells
LMNA	0	1.00589	0.818	0.308	0	Epithelial cells
ARHGAP29	0	1.00215	0.654	0.061	0	Epithelial cells
VEGFA	0	0.999073	0.677	0.168	0	Epithelial cells
CXADR	0	0.995576	0.646	0.019	0	Epithelial cells
RND3	0	0.994645	0.6	0.091	0	Epithelial cells
MARCKSL1	0	0.984494	0.76	0.222	0	Epithelial cells
ATP5G3	0	0.976114	0.855	0.613	0	Epithelial cells
TMEM238	0	0.974294	0.699	0.19	0	Epithelial cells
LY6E1	0	0.973747	0.915	0.73	0	Epithelial cells
YAP1	0	0.969049	0.687	0.078	0	Epithelial cells
PPP1CB	0	0.968615	0.814	0.446	0	Epithelial cells
TIMM8B	0	0.968318	0.786	0.435	0	Epithelial cells
LAMA5	0	0.963982	0.668	0.068	0	Epithelial cells
ST14	0	0.963689	0.693	0.111	0	Epithelial cells
AP000432.1	0	0.962349	0.186	0.009	0	Epithelial cells
NDUFS5	0	0.961606	0.885	0.679	0	Epithelial cells
EMP2	0	0.96039	0.672	0.124	0	Epithelial cells
MEST	0	0.960231	0.528	0.049	0	Epithelial cells
PUF60	0	0.959351	0.799	0.372	0	Epithelial cells
TPM1	0	0.958811	0.781	0.213	0	Epithelial cells
SLC2A1	0	0.958318	0.618	0.133	0	Epithelial cells
TMED10	0	0.957604	0.78	0.457	0	Epithelial cells
SERPINH1	0	0.95711	0.724	0.196	0	Epithelial cells
COX5B	0	0.95372	0.882	0.701	0	Epithelial cells
NPC2	0	0.952203	0.834	0.459	0	Epithelial cells
KRTCAP3	0	0.951364	0.646	0.021	0	Epithelial cells
AQP5	0	0.948873	0.487	0.012	0	Epithelial cells
MLF2	0	0.946312	0.782	0.322	0	Epithelial cells
STXBP6	0	0.941328	0.593	0.022	0	Epithelial cells
RPS17	0	0.941069	0.913	0.77	0	Epithelial cells
PRSS8	0	0.941022	0.633	0.016	0	Epithelial cells
RPL7	0	0.939713	0.923	0.822	0	Epithelial cells
HMGN3	0	0.939561	0.796	0.44	0	Epithelial cells
VTCN1	0	0.937636	0.534	0.016	0	Epithelial cells
TOMM20	0	0.936592	0.809	0.517	0	Epithelial cells
NDRG1	0	0.936336	0.684	0.245	0	Epithelial cells
P4HB	0	0.935491	0.793	0.496	0	Epithelial cells
RAB25	0	0.934276	0.646	0.012	0	Epithelial cells
RPL22	0	0.932187	0.95	0.871	0	Epithelial cells
HMGA1	0	0.93143	0.734	0.249	0	Epithelial cells
JUP	0	0.931169	0.677	0.077	0	Epithelial cells
FKBP4	0	0.9279	0.72	0.188	0	Epithelial cells
CITED4	0	0.927373	0.677	0.088	0	Epithelial cells
COX7B	0	0.925137	0.862	0.623	0	Epithelial cells
CCDC6	0	0.923965	0.718	0.17	0	Epithelial cells
PDIA6	0	0.920405	0.78	0.514	0	Epithelial cells
TCEAL9	0	0.919297	0.706	0.171	0	Epithelial cells
SCNN1A	0	0.91869	0.618	0.022	0	Epithelial cells
CAMTA1	0	0.918475	0.777	0.304	0	Epithelial cells
SLIRP	0	0.917501	0.752	0.419	0	Epithelial cells
PAWR	0	0.916973	0.685	0.091	0	Epithelial cells
GTF2I	0	0.916829	0.826	0.471	0	Epithelial cells
PLA2G16	0	0.915616	0.643	0.327	0	Epithelial cells
YBX1	0	0.915477	0.9	0.73	0	Epithelial cells
CEBPD	0	0.913204	0.785	0.321	0	Epithelial cells
NCKAP1	0	0.91249	0.71	0.103	0	Epithelial cells
SPINK1	0	0.912222	0.192	0.015	0	Epithelial cells
SINHCAF	0	0.911104	0.725	0.221	0	Epithelial cells
TM7SF2	0	0.909662	0.594	0.06	0	Epithelial cells
IGF2BP2	0	0.9088	0.512	0.042	0	Epithelial cells
C10orf10	0	0.904226	0.448	0.061	0	Epithelial cells
CYSTM1	0	0.900041	0.713	0.203	0	Epithelial cells
CSTB	0	0.898479	0.88	0.623	0	Epithelial cells
ANXA4	0	0.89574	0.679	0.237	0	Epithelial cells
GLRX5	0	0.893902	0.732	0.319	0	Epithelial cells
TMEM123	0	0.891744	0.792	0.426	0	Epithelial cells
UBE2H	0	0.890154	0.75	0.292	0	Epithelial cells
HDGF	0	0.889838	0.789	0.321	0	Epithelial cells
STARD10	0	0.888473	0.633	0.084	0	Epithelial cells
HEBP2	0	0.884439	0.773	0.346	0	Epithelial cells
RNASE1	0	0.883665	0.513	0.163	0	Epithelial cells
HINT11	0	0.882002	0.863	0.715	0	Epithelial cells
CTTN	0	0.881697	0.722	0.123	0	Epithelial cells
TPM4	0	0.880729	0.863	0.547	0	Epithelial cells
RPLP0	0	0.880718	0.941	0.837	0	Epithelial cells
PDIA4	0	0.880681	0.714	0.324	0	Epithelial cells
LAMB3	0	0.878598	0.562	0.026	0	Epithelial cells
PSMB5	0	0.878425	0.751	0.32	0	Epithelial cells
THSD4	0	0.878375	0.278	0.017	0	Epithelial cells
AGR2	0	0.873788	0.387	0.008	0	Epithelial cells
CLDN1	0	0.869728	0.407	0.069	0	Epithelial cells
CDH1	0	0.866602	0.618	0.019	0	Epithelial cells
PDLIM1	0	0.866277	0.655	0.115	0	Epithelial cells
MRPL51	0	0.864321	0.803	0.515	0	Epithelial cells
SLC25A4	0	0.862618	0.597	0.123	0	Epithelial cells
DSC2	0	0.862	0.543	0.046	0	Epithelial cells
PTMS	0	0.856909	0.841	0.505	0	Epithelial cells
KLK10	0	0.856675	0.43	0.019	0	Epithelial cells
ECHS1	0	0.856163	0.774	0.391	0	Epithelial cells
LGALS3BP	0	0.855977	0.766	0.317	0	Epithelial cells
PBX1	0	0.852146	0.629	0.077	0	Epithelial cells
C8orf33	0	0.848969	0.706	0.183	0	Epithelial cells
S100A11	0	0.848511	0.934	0.802	0	Epithelial cells
CALR	0	0.847847	0.856	0.672	0	Epithelial cells
EHF	0	0.846583	0.551	0.014	0	Epithelial cells
REXO2	0	0.845617	0.725	0.281	0	Epithelial cells
RPS27A	0	0.842682	0.972	0.936	0	Epithelial cells
C3	0	0.842374	0.522	0.201	0	Epithelial cells
WT1	0	0.841378	0.507	0.045	0	Epithelial cells
ENO11	0	0.840112	0.895	0.69	0	Epithelial cells
LGALS3	0	0.839436	0.841	0.507	0	Epithelial cells
ATP5J2	0	0.838229	0.863	0.647	0	Epithelial cells
NFIB	0	0.837915	0.63	0.076	0	Epithelial cells
GPRC5A	0	0.836126	0.36	0.021	0	Epithelial cells
C1orf122	0	0.835861	0.726	0.29	0	Epithelial cells
CXXC5	0	0.834268	0.702	0.219	0	Epithelial cells
GLO1	0	0.832799	0.704	0.229	0	Epithelial cells
H3F3A1	0	0.831743	0.948	0.883	0	Epithelial cells
TNFRSF12A	0	0.826887	0.627	0.133	0	Epithelial cells
GCSH	0	0.826531	0.675	0.158	0	Epithelial cells
TUBA1C	0	0.824981	0.77	0.328	0	Epithelial cells
NDUFA4L2	0	0.824022	0.191	0.026	0	Epithelial cells
TSTA3	0	0.823533	0.728	0.279	0	Epithelial cells
YWHAE	0	0.822858	0.839	0.529	0	Epithelial cells
RTN3	0	0.822046	0.754	0.302	0	Epithelial cells
ERBB3	0	0.820715	0.574	0.017	0	Epithelial cells
PHGDH	0	0.819407	0.594	0.072	0	Epithelial cells
GGCT	0	0.819291	0.701	0.219	0	Epithelial cells
ARPC1A	0	0.819038	0.728	0.234	0	Epithelial cells
NDUFB7	0	0.816713	0.839	0.538	0	Epithelial cells
TPD52L1	0	0.815529	0.568	0.035	0	Epithelial cells
ISYNA1	0	0.810118	0.628	0.088	0	Epithelial cells
PEG10	0	0.809968	0.416	0.022	0	Epithelial cells
EFNA1	0	0.809682	0.594	0.034	0	Epithelial cells
EI24	0	0.808652	0.721	0.214	0	Epithelial cells
TSPAN3	0	0.804054	0.692	0.229	0	Epithelial cells
CD151	0	0.803849	0.745	0.294	0	Epithelial cells
ROMO1	0	0.802826	0.795	0.466	0	Epithelial cells
LSM4	0	0.800811	0.765	0.34	0	Epithelial cells
AP1M2	0	0.800341	0.615	0.012	0	Epithelial cells
CTBP2	0	0.796377	0.693	0.154	0	Epithelial cells
ADAMTS1	0	0.79447	0.418	0.051	0	Epithelial cells
AURKAIP1	0	0.794271	0.81	0.505	0	Epithelial cells
NDUFS8	0	0.793156	0.791	0.448	0	Epithelial cells
CXCL17	0	0.793053	0.328	0.017	0	Epithelial cells
ATP1A1	0	0.792285	0.761	0.382	0	Epithelial cells
CDK16	0	0.79202	0.676	0.136	0	Epithelial cells
CNPY2	0	0.784066	0.757	0.373	0	Epithelial cells
RAB13	0	0.782102	0.718	0.216	0	Epithelial cells
S100A2	0	0.780879	0.375	0.024	0	Epithelial cells
MPZL2	0	0.780211	0.61	0.034	0	Epithelial cells
MDH2	0	0.777732	0.768	0.402	0	Epithelial cells
APP	0	0.776787	0.711	0.207	0	Epithelial cells
CMTM6	0	0.775935	0.748	0.438	0	Epithelial cells
DDAH2	0	0.773085	0.724	0.252	0	Epithelial cells
ATP5L	0	0.771434	0.904	0.784	0	Epithelial cells
MRPL14	0	0.770034	0.749	0.336	0	Epithelial cells
CYHR1	0	0.768764	0.726	0.232	0	Epithelial cells
COA4	0	0.768452	0.734	0.299	0	Epithelial cells
BHLHE41	0	0.768388	0.538	0.162	0	Epithelial cells
MRPL12	0	0.765452	0.663	0.222	0	Epithelial cells
FKBP2	0	0.764292	0.821	0.485	0	Epithelial cells
HOOK2	0	0.762197	0.664	0.127	0	Epithelial cells
ERH	0	0.75997	0.804	0.539	0	Epithelial cells
MGST2	0	0.759179	0.636	0.188	0	Epithelial cells
MRPL21	0	0.758825	0.733	0.28	0	Epithelial cells
TFPI2	0	0.758245	0.342	0.013	0	Epithelial cells
CLDN10	0	0.757538	0.401	0.014	0	Epithelial cells
PTK2	0	0.757078	0.68	0.107	0	Epithelial cells
PRAME	0	0.754942	0.44	0.014	0	Epithelial cells
SLC25A5	0	0.754833	0.79	0.505	0	Epithelial cells
FBXO32	0	0.753142	0.453	0.113	0	Epithelial cells
CNN3	0	0.752798	0.707	0.123	0	Epithelial cells
MLF1	0	0.750905	0.55	0.056	0	Epithelial cells
KLK8	0	0.749147	0.538	0.012	0	Epithelial cells
GUK1	0	0.749067	0.866	0.691	0	Epithelial cells
SF3B6	0	0.748064	0.815	0.517	0	Epithelial cells
KLK6	0	0.745438	0.458	0.009	0	Epithelial cells
MTCH1	0	0.743523	0.785	0.37	0	Epithelial cells
BANF1	0	0.741592	0.806	0.445	0	Epithelial cells
SEC61G	0	0.740684	0.827	0.589	0	Epithelial cells
POLR2H	0	0.739491	0.73	0.279	0	Epithelial cells
ACP1	0	0.735657	0.764	0.363	0	Epithelial cells
MYL61	0	0.735538	0.951	0.884	0	Epithelial cells
SNRPE	0	0.734791	0.791	0.458	0	Epithelial cells
WEE1	0	0.734424	0.533	0.115	0	Epithelial cells
ACTN1	0	0.734301	0.708	0.232	0	Epithelial cells
SERPING1	0	0.732251	0.711	0.21	0	Epithelial cells
GPAA1	0	0.731237	0.672	0.213	0	Epithelial cells
ATP5J	0	0.730246	0.843	0.631	0	Epithelial cells
CYB5A	0	0.728886	0.642	0.225	0	Epithelial cells
GAS6	0	0.727306	0.589	0.196	0	Epithelial cells
SEM1	0	0.726851	0.854	0.628	0	Epithelial cells
PHLDA2	0	0.726829	0.511	0.092	0	Epithelial cells
ATP5B	0	0.725886	0.822	0.543	0	Epithelial cells
CADM1	0	0.725783	0.599	0.167	0	Epithelial cells
MRPS15	0	0.725673	0.721	0.319	0	Epithelial cells
MAGEF1	0	0.724155	0.599	0.128	0	Epithelial cells
H1F0	0	0.723504	0.612	0.133	0	Epithelial cells
HDLBP	0	0.721734	0.784	0.377	0	Epithelial cells
AHCY	0	0.721477	0.628	0.133	0	Epithelial cells
UCP21	0	0.721051	0.759	0.417	0	Epithelial cells
CHCHD2	0	0.71987	0.88	0.746	0	Epithelial cells
SORT1	0	0.719135	0.612	0.076	0	Epithelial cells
TMEM14C	0	0.718427	0.766	0.386	0	Epithelial cells
GPRC5C	0	0.717662	0.569	0.034	0	Epithelial cells
TMEM141	0	0.715758	0.629	0.243	0	Epithelial cells
SOX9	0	0.715172	0.411	0.01	0	Epithelial cells
EIF4G1	0	0.71366	0.744	0.33	0	Epithelial cells
NTS	0	0.712879	0.111	0.011	0	Epithelial cells
ARF4	0	0.711878	0.768	0.383	0	Epithelial cells
TRIB1	0	0.710711	0.606	0.175	0	Epithelial cells
PEBP1	0	0.710097	0.826	0.543	0	Epithelial cells
KIAA1522	0	0.709953	0.589	0.04	0	Epithelial cells
NAXE	0	0.706909	0.701	0.228	0	Epithelial cells
CD55	0	0.705367	0.605	0.205	0	Epithelial cells
ATP5O	0	0.705297	0.814	0.515	0	Epithelial cells
EIF3E	0	0.70398	0.845	0.602	0	Epithelial cells
GID8	0	0.701345	0.687	0.205	0	Epithelial cells
AHCYL1	0	0.701126	0.71	0.26	0	Epithelial cells
LRRC41	0	0.70041	0.642	0.18	0	Epithelial cells
TSPAN1	0	0.699907	0.336	0.008	0	Epithelial cells
LAMTOR1	0	0.699785	0.77	0.438	0	Epithelial cells
SCX	0	0.698234	0.438	0.03	0	Epithelial cells
MAF1	0	0.697478	0.754	0.328	0	Epithelial cells
BEX1	0	0.696404	0.214	0.007	0	Epithelial cells
TATDN1	0	0.694914	0.674	0.191	0	Epithelial cells
ADI1	0	0.693866	0.706	0.249	0	Epithelial cells
DNAJC19	0	0.691702	0.724	0.314	0	Epithelial cells
SH3YL1	0	0.691486	0.646	0.138	0	Epithelial cells
MECOM	0	0.689953	0.537	0.028	0	Epithelial cells
SCD	0	0.688646	0.417	0.112	0	Epithelial cells
KRT23	0	0.688007	0.456	0.008	0	Epithelial cells
NFIX	0	0.687061	0.598	0.069	0	Epithelial cells
SYPL1	0	0.685346	0.684	0.242	0	Epithelial cells
FBXO21	0	0.685195	0.573	0.151	0	Epithelial cells
CETN2	0	0.68316	0.654	0.153	0	Epithelial cells
ATN1	0	0.682964	0.655	0.179	0	Epithelial cells
ESRP1	0	0.681852	0.589	0.011	0	Epithelial cells
KLK11	0	0.681757	0.419	0.014	0	Epithelial cells
SLC25A29	0	0.681645	0.595	0.082	0	Epithelial cells
PRDX4	0	0.68161	0.722	0.32	0	Epithelial cells
CD47	0	0.678861	0.763	0.461	0	Epithelial cells
GPX3	0	0.678628	0.455	0.056	0	Epithelial cells
C19orf53	0	0.678212	0.849	0.614	0	Epithelial cells
ATRAID	0	0.677747	0.752	0.428	0	Epithelial cells
RPL5	0	0.676425	0.935	0.855	0	Epithelial cells
CSRP1	0	0.673617	0.684	0.222	0	Epithelial cells
LTBP3	0	0.672449	0.704	0.223	0	Epithelial cells
LTBR	0	0.670825	0.639	0.158	0	Epithelial cells
VEGFB	0	0.67066	0.706	0.27	0	Epithelial cells
VSIG2	0	0.668848	0.423	0.011	0	Epithelial cells
PDCD5	0	0.667368	0.787	0.427	0	Epithelial cells
TIMM13	0	0.667256	0.71	0.318	0	Epithelial cells
MT1F	0	0.666975	0.601	0.176	0	Epithelial cells
RPS8	0	0.665637	0.961	0.911	0	Epithelial cells
PHLDA3	0	0.665433	0.592	0.122	0	Epithelial cells
VDAC1	0	0.665129	0.789	0.46	0	Epithelial cells
OLA1	0	0.662435	0.695	0.255	0	Epithelial cells
NFIA	0	0.662344	0.57	0.079	0	Epithelial cells
RAMP1	0	0.661864	0.453	0.044	0	Epithelial cells
GADD45GIP1	0	0.66125	0.799	0.49	0	Epithelial cells
APOPT1	0	0.661139	0.669	0.241	0	Epithelial cells
CAMK2N1	0	0.658443	0.34	0.059	0	Epithelial cells
HSBP1	0	0.657769	0.795	0.441	0	Epithelial cells
EIF1AX	0	0.657357	0.821	0.536	0	Epithelial cells
LAMC1	0	0.656217	0.625	0.095	0	Epithelial cells
METRN	0	0.656035	0.678	0.174	0	Epithelial cells
UQCC3	0	0.653364	0.69	0.202	0	Epithelial cells
AK4	0	0.653118	0.566	0.056	0	Epithelial cells
FNBP1L	0	0.652503	0.615	0.069	0	Epithelial cells
PTGR1	0	0.649828	0.592	0.094	0	Epithelial cells
MRPL15	0	0.64892	0.663	0.212	0	Epithelial cells
PEA15	0	0.6473	0.685	0.241	0	Epithelial cells
CTNND1	0	0.647254	0.695	0.211	0	Epithelial cells
RBM47	0	0.645642	0.6	0.131	0	Epithelial cells
EPHX1	0	0.645304	0.597	0.092	0	Epithelial cells
VWA1	0	0.644271	0.606	0.056	0	Epithelial cells
ANKRD65	0	0.643175	0.536	0.032	0	Epithelial cells
PHB2	0	0.641069	0.737	0.377	0	Epithelial cells
WDR45B	0	0.640991	0.687	0.225	0	Epithelial cells
POR	0	0.640224	0.676	0.196	0	Epithelial cells
MUC4	0	0.639954	0.172	0.031	0	Epithelial cells
DPY30	0	0.639603	0.738	0.337	0	Epithelial cells
RPL18A	0	0.639506	0.966	0.927	0	Epithelial cells
IFT22	0	0.639308	0.597	0.083	0	Epithelial cells
GSTM3	0	0.638952	0.423	0.084	0	Epithelial cells
SRP9	0	0.638733	0.781	0.48	0	Epithelial cells
OBSL1	0	0.638359	0.565	0.05	0	Epithelial cells
LAMTOR5	0	0.63828	0.797	0.515	0	Epithelial cells
BSG	0	0.63828	0.783	0.491	0	Epithelial cells
C9orf3	0	0.63733	0.603	0.133	0	Epithelial cells
HMGB3	0	0.636643	0.572	0.106	0	Epithelial cells
IFT57	0	0.636583	0.637	0.146	0	Epithelial cells
HIST3H2A	0	0.636404	0.565	0.123	0	Epithelial cells
LINC01320	0	0.635666	0.227	0.003	0	Epithelial cells
MACROD2	0	0.635665	0.329	0.013	0	Epithelial cells
CCND1	0	0.634757	0.575	0.18	0	Epithelial cells
BICD1	0	0.63465	0.591	0.137	0	Epithelial cells
MRPL11	0	0.63379	0.686	0.281	0	Epithelial cells
TCEAL4	0	0.633248	0.678	0.228	0	Epithelial cells
TRIP6	0	0.632711	0.66	0.159	0	Epithelial cells
KIAA1217	0	0.63241	0.577	0.07	0	Epithelial cells
NDUFV1	0	0.632361	0.713	0.286	0	Epithelial cells
RPS21	0	0.631548	0.931	0.872	0	Epithelial cells
ATOX1	0	0.630933	0.759	0.405	0	Epithelial cells
ZNF704	0	0.630273	0.532	0.036	0	Epithelial cells
BUD31	0	0.629873	0.788	0.446	0	Epithelial cells
NECTIN2	0	0.627603	0.645	0.163	0	Epithelial cells
SUMO1	0	0.627539	0.784	0.475	0	Epithelial cells
TMEM14B	0	0.627348	0.758	0.413	0	Epithelial cells
TUBB	0	0.627038	0.819	0.507	0	Epithelial cells
PKP2	0	0.6269	0.477	0.012	0	Epithelial cells
EPS8L1	0	0.625788	0.548	0.048	0	Epithelial cells
RCN2	0	0.625194	0.694	0.289	0	Epithelial cells
MYO6	0	0.624904	0.583	0.079	0	Epithelial cells
FIS1	0	0.624711	0.787	0.475	0	Epithelial cells
RBM38	0	0.624701	0.682	0.195	0	Epithelial cells
SEZ6L2	0	0.624645	0.576	0.061	0	Epithelial cells
NDUFAB1	0	0.623867	0.761	0.448	0	Epithelial cells
UQCRFS1	0	0.623134	0.731	0.355	0	Epithelial cells
PARD6B	0	0.622969	0.569	0.027	0	Epithelial cells
UBA1	0	0.6225	0.709	0.301	0	Epithelial cells
BRI3	0	0.622114	0.826	0.495	0	Epithelial cells
TAGLN2	0	0.621749	0.83	0.548	0	Epithelial cells
SELENBP1	0	0.620648	0.509	0.044	0	Epithelial cells
VCL	0	0.620487	0.643	0.156	0	Epithelial cells
CTNNA1	0	0.62019	0.737	0.296	0	Epithelial cells
PPP1R1B	0	0.618693	0.242	0.009	0	Epithelial cells
NENF	0	0.618534	0.691	0.317	0	Epithelial cells
CCT3	0	0.618145	0.793	0.451	0	Epithelial cells
NDUFC11	0	0.617463	0.795	0.494	0	Epithelial cells
SNRPF	0	0.617094	0.775	0.492	0	Epithelial cells
MGAT4B	0	0.617003	0.672	0.196	0	Epithelial cells
PTMA	0	0.616693	0.989	0.956	0	Epithelial cells
ILF2	0	0.616343	0.742	0.367	0	Epithelial cells
DDT	0	0.61617	0.764	0.47	0	Epithelial cells
CKS1B	0	0.615184	0.58	0.182	0	Epithelial cells
PLTP	0	0.613837	0.604	0.166	0	Epithelial cells
FLOT1	0	0.613611	0.741	0.326	0	Epithelial cells
EEF1D	0	0.612782	0.919	0.823	0	Epithelial cells
ERGIC3	0	0.612739	0.711	0.303	0	Epithelial cells
MRPL331	0	0.612046	0.788	0.476	0	Epithelial cells
RPL39L	0	0.610801	0.534	0.127	0	Epithelial cells
TMPRSS4	0	0.610338	0.486	0.008	0	Epithelial cells
GIPC1	0	0.609863	0.682	0.214	0	Epithelial cells
C6orf132	0	0.607469	0.519	0.013	0	Epithelial cells
ATP5C1	0	0.606919	0.808	0.528	0	Epithelial cells
CALM2	0	0.603985	0.893	0.727	0	Epithelial cells
NRBP2	0	0.603507	0.534	0.077	0	Epithelial cells
ERO1A	0	0.602108	0.624	0.271	0	Epithelial cells
SLC44A4	0	0.601693	0.494	0.024	0	Epithelial cells
CFAP36	0	0.601639	0.623	0.151	0	Epithelial cells
PCDH7	0	0.60147	0.537	0.06	0	Epithelial cells
BUD23	0	0.601333	0.724	0.317	0	Epithelial cells
FLNB	0	0.600224	0.585	0.118	0	Epithelial cells
GMPR	0	0.599928	0.464	0.063	0	Epithelial cells
TMEM9	0	0.599848	0.64	0.142	0	Epithelial cells
DDIT3	0	0.599016	0.603	0.217	0	Epithelial cells
BTF3L4	0	0.598985	0.724	0.308	0	Epithelial cells
MORF4L2	0	0.598664	0.73	0.331	0	Epithelial cells
SCOC	0	0.598041	0.659	0.207	0	Epithelial cells
LAPTM4A	0	0.597849	0.769	0.428	0	Epithelial cells
BMP7	0	0.597269	0.41	0.009	0	Epithelial cells
PRELID3B	0	0.596126	0.649	0.184	0	Epithelial cells
ARHGEF12	0	0.594796	0.676	0.19	0	Epithelial cells
C20orf204	0	0.593832	0.375	0.035	0	Epithelial cells
ITGA3	0	0.592405	0.483	0.056	0	Epithelial cells
NCOA7	0	0.590864	0.61	0.274	0	Epithelial cells
PLPP2	0	0.590558	0.514	0.023	0	Epithelial cells
CEBPB	0	0.59002	0.823	0.469	0	Epithelial cells
RPL37A	0	0.589899	0.973	0.937	0	Epithelial cells
KDELR1	0	0.589696	0.728	0.371	0	Epithelial cells
POLD2	0	0.588816	0.624	0.151	0	Epithelial cells
ERRFI1	0	0.588717	0.466	0.055	0	Epithelial cells
PTS	0	0.588214	0.623	0.167	0	Epithelial cells
SSBP3	0	0.587698	0.636	0.155	0	Epithelial cells
KLK5	0	0.586575	0.279	0.019	0	Epithelial cells
NPR1	0	0.586534	0.438	0.023	0	Epithelial cells
ALDH7A1	0	0.586307	0.581	0.096	0	Epithelial cells
PON2	0	0.585668	0.63	0.144	0	Epithelial cells
MORN2	0	0.585045	0.572	0.094	0	Epithelial cells
PCSK1N	0	0.584382	0.368	0.022	0	Epithelial cells
RDH11	0	0.584112	0.541	0.244	0	Epithelial cells
NXN	0	0.583968	0.557	0.081	0	Epithelial cells
STAU1	0	0.582756	0.741	0.343	0	Epithelial cells
ATF5	0	0.582363	0.549	0.175	0	Epithelial cells
KLF5	0	0.58177	0.499	0.018	0	Epithelial cells
PSMD2	0	0.581575	0.718	0.322	0	Epithelial cells
PPIC	0	0.581197	0.566	0.114	0	Epithelial cells
PRDX1	0	0.581097	0.862	0.614	0	Epithelial cells
MRPS26	0	0.579233	0.702	0.278	0	Epithelial cells
MCUR1	0	0.578286	0.638	0.187	0	Epithelial cells
AGRN	0	0.578153	0.597	0.112	0	Epithelial cells
NHP2	0	0.577375	0.721	0.339	0	Epithelial cells
CENPW	0	0.576286	0.389	0.106	0	Epithelial cells
TMEM251	0	0.571581	0.546	0.135	0	Epithelial cells
CRB3	0	0.570964	0.539	0.011	0	Epithelial cells
AAMDC	0	0.570827	0.602	0.135	0	Epithelial cells
VDAC2	0	0.570659	0.767	0.453	0	Epithelial cells
PKP3	0	0.568413	0.544	0.014	0	Epithelial cells
TSPAN6	0	0.568349	0.556	0.054	0	Epithelial cells
PNKD	0	0.566466	0.722	0.299	0	Epithelial cells
FAM136A	0	0.565597	0.69	0.244	0	Epithelial cells
UQCC2	0	0.565461	0.688	0.345	0	Epithelial cells
C11orf1	0	0.565091	0.567	0.117	0	Epithelial cells
SSU72	0	0.564995	0.801	0.492	0	Epithelial cells
MRPL47	0	0.564558	0.684	0.287	0	Epithelial cells
RFXANK	0	0.56427	0.679	0.236	0	Epithelial cells
PATJ	0	0.564159	0.602	0.073	0	Epithelial cells
NQO1	0	0.56406	0.461	0.053	0	Epithelial cells
AC092803.2	0	0.562941	0.317	0.037	0	Epithelial cells
MRPS16	0	0.561669	0.7	0.312	0	Epithelial cells
FAM162A	0	0.561061	0.725	0.316	0	Epithelial cells
NDUFA5	0	0.559536	0.741	0.382	0	Epithelial cells
FAM210B	0	0.559145	0.628	0.152	0	Epithelial cells
COX7A2L1	0	0.558585	0.776	0.455	0	Epithelial cells
IMPDH2	0	0.558169	0.613	0.194	0	Epithelial cells
TNNI3	0	0.558052	0.491	0.007	0	Epithelial cells
TMEM134	0	0.557854	0.691	0.274	0	Epithelial cells
PAFAH1B2	0	0.55775	0.69	0.229	0	Epithelial cells
JTB	0	0.557723	0.805	0.55	0	Epithelial cells
ANKRD37	0	0.557651	0.448	0.126	0	Epithelial cells
CCT6A	0	0.554414	0.762	0.391	0	Epithelial cells
CDC42EP4	0	0.55415	0.515	0.032	0	Epithelial cells
COX20	0	0.553701	0.762	0.393	0	Epithelial cells
RAB2A	0	0.553601	0.79	0.473	0	Epithelial cells
CDKN1C	0	0.553174	0.446	0.09	0	Epithelial cells
GNB2	0	0.552231	0.798	0.472	0	Epithelial cells
MSRB2	0	0.551623	0.649	0.216	0	Epithelial cells
CNFN	0	0.551033	0.465	0.018	0	Epithelial cells
GRINA	0	0.549597	0.674	0.242	0	Epithelial cells
FDPS	0	0.549455	0.74	0.375	0	Epithelial cells
DNPH11	0	0.548423	0.699	0.334	0	Epithelial cells
MRPL13	0	0.548192	0.69	0.269	0	Epithelial cells
RHEB	0	0.54774	0.764	0.411	0	Epithelial cells
TSPAN12	0	0.547728	0.436	0.025	0	Epithelial cells
CAPN1	0	0.54602	0.7	0.266	0	Epithelial cells
CLNS1A	0	0.545181	0.72	0.327	0	Epithelial cells
LINC00969	0	0.544917	0.657	0.3	0	Epithelial cells
RAB30-AS1	0	0.544821	0.619	0.168	0	Epithelial cells
ENAH	0	0.544472	0.598	0.103	0	Epithelial cells
EXOSC4	0	0.544331	0.585	0.119	0	Epithelial cells
ENY2	0	0.54358	0.819	0.526	0	Epithelial cells
POLR2I	0	0.543556	0.749	0.359	0	Epithelial cells
SLC25A39	0	0.543262	0.683	0.248	0	Epithelial cells
TJP1	0	0.542808	0.593	0.084	0	Epithelial cells
APH1A	0	0.542672	0.722	0.303	0	Epithelial cells
AIFM1	0	0.54267	0.552	0.123	0	Epithelial cells
DUSP23	0	0.541974	0.671	0.245	0	Epithelial cells
BCAP31	0	0.540383	0.752	0.44	0	Epithelial cells
PHB	0	0.539792	0.74	0.387	0	Epithelial cells
SMS	0	0.539386	0.695	0.271	0	Epithelial cells
F11R	0	0.539357	0.582	0.083	0	Epithelial cells
PIGT	0	0.539181	0.66	0.283	0	Epithelial cells
PDXK	0	0.538547	0.7	0.317	0	Epithelial cells
ARMC10	0	0.536924	0.644	0.172	0	Epithelial cells
ZCRB1	0	0.536714	0.74	0.376	0	Epithelial cells
ATP5F1	0	0.53648	0.751	0.403	0	Epithelial cells
MRPL52	0	0.536055	0.753	0.42	0	Epithelial cells
AFDN	0	0.535979	0.583	0.104	0	Epithelial cells
SMIM24	0	0.535842	0.302	0.013	0	Epithelial cells
BLVRB	0	0.535414	0.66	0.239	0	Epithelial cells
HOMER2	0	0.534796	0.484	0.025	0	Epithelial cells
TMEM41A	0	0.534309	0.567	0.101	0	Epithelial cells
SHROOM3	0	0.534078	0.49	0.018	0	Epithelial cells
TMEM219	0	0.532861	0.746	0.39	0	Epithelial cells
SMIM14	0	0.532641	0.6	0.156	0	Epithelial cells
FOXQ1	0	0.532577	0.38	0.017	0	Epithelial cells
IGFBP3	0	0.53254	0.288	0.071	0	Epithelial cells
EBNA1BP2	0	0.531724	0.648	0.206	0	Epithelial cells
ERBB2	0	0.531438	0.505	0.038	0	Epithelial cells
DAG1	0	0.531239	0.572	0.098	0	Epithelial cells
HOOK1	0	0.530448	0.519	0.021	0	Epithelial cells
NDUFB5	0	0.529826	0.715	0.378	0	Epithelial cells
IDH2	0	0.529694	0.728	0.426	0	Epithelial cells
SNRPD1	0	0.528188	0.754	0.441	0	Epithelial cells
EIF4H	0	0.527576	0.755	0.385	0	Epithelial cells
EPPK1	0	0.526902	0.456	0.012	0	Epithelial cells
RBBP7	0	0.524939	0.692	0.281	0	Epithelial cells
QSOX1	0	0.522097	0.608	0.2	0	Epithelial cells
KCTD1	0	0.521898	0.428	0.027	0	Epithelial cells
NPW	0	0.521679	0.379	0.024	0	Epithelial cells
TLE1	0	0.521192	0.551	0.074	0	Epithelial cells
LAMC2	0	0.520792	0.413	0.009	0	Epithelial cells
RALBP1	0	0.520704	0.717	0.374	0	Epithelial cells
PTP4A31	0	0.520477	0.522	0.077	0	Epithelial cells
FAM83H	0	0.52026	0.496	0.024	0	Epithelial cells
YIF1A	0	0.519609	0.672	0.284	0	Epithelial cells
AHNAK2	0	0.518996	0.417	0.03	0	Epithelial cells
SCRIB	0	0.518689	0.563	0.094	0	Epithelial cells
TUFM	0	0.518527	0.746	0.423	0	Epithelial cells
SYAP1	0	0.518044	0.708	0.31	0	Epithelial cells
PCP4	0	0.517874	0.219	0.005	0	Epithelial cells
PNPLA4	0	0.516831	0.533	0.083	0	Epithelial cells
CCNG1	0	0.515347	0.586	0.181	0	Epithelial cells
PDHA1	0	0.514769	0.664	0.227	0	Epithelial cells
PRKCSH	0	0.514583	0.701	0.313	0	Epithelial cells
DOK5	0	0.514293	0.362	0.045	0	Epithelial cells
OAT	0	0.513415	0.604	0.167	0	Epithelial cells
CCT2	0	0.513393	0.724	0.34	0	Epithelial cells
TCEA3	0	0.512806	0.49	0.039	0	Epithelial cells
PPFIBP1	0	0.51146	0.635	0.145	0	Epithelial cells
AK2	0	0.511312	0.677	0.277	0	Epithelial cells
BAD	0	0.510775	0.66	0.221	0	Epithelial cells
PSMC1	0	0.510579	0.715	0.375	0	Epithelial cells
MGST1	0	0.509391	0.365	0.032	0	Epithelial cells
TPD52L2	0	0.509335	0.643	0.199	0	Epithelial cells
CTNNAL1	0	0.509276	0.482	0.088	0	Epithelial cells
PGM2L1	0	0.508977	0.542	0.149	0	Epithelial cells
BEX2	0	0.508652	0.5	0.042	0	Epithelial cells
TUBB4B	0	0.508262	0.769	0.425	0	Epithelial cells
TRIM28	0	0.508207	0.695	0.305	0	Epithelial cells
CHMP4C	0	0.508147	0.522	0.013	0	Epithelial cells
EDN1	0	0.507829	0.288	0.017	0	Epithelial cells
PI3	0	0.50709	0.138	0.009	0	Epithelial cells
MTX2	0	0.506653	0.634	0.179	0	Epithelial cells
NT5DC2	0	0.506593	0.521	0.12	0	Epithelial cells
YIPF2	0	0.506325	0.623	0.161	0	Epithelial cells
RPN1	0	0.506023	0.688	0.337	0	Epithelial cells
BEX4	0	0.505579	0.618	0.208	0	Epithelial cells
ALG3	0	0.505536	0.583	0.185	0	Epithelial cells
STOML2	0	0.505314	0.687	0.295	0	Epithelial cells
HOXD1	0	0.505274	0.274	0.01	0	Epithelial cells
CFL2	0	0.504738	0.499	0.118	0	Epithelial cells
WWC1	0	0.504712	0.477	0.027	0	Epithelial cells
FZD3	0	0.502545	0.456	0.045	0	Epithelial cells
CDK2AP1	0	0.502109	0.647	0.202	0	Epithelial cells
RDX	0	0.502105	0.699	0.32	0	Epithelial cells
USP9X	0	0.501778	0.671	0.283	0	Epithelial cells
TFAP2A	0	0.50065	0.359	0.008	0	Epithelial cells
USP53	0	0.500645	0.484	0.099	0	Epithelial cells
PPCS	0	0.500096	0.707	0.331	0	Epithelial cells
SEPHS2	0	0.498934	0.651	0.238	0	Epithelial cells
AZIN1	0	0.498581	0.676	0.255	0	Epithelial cells
IRF2BPL	0	0.497747	0.585	0.141	0	Epithelial cells
CNIH4	0	0.49689	0.68	0.287	0	Epithelial cells
PTGS1	0	0.496464	0.45	0.089	0	Epithelial cells
NUPR2	0	0.496054	0.343	0.006	0	Epithelial cells
FXR1	0	0.495103	0.746	0.401	0	Epithelial cells
EYA2	0	0.494793	0.397	0.022	0	Epithelial cells
HYOU1	0	0.494765	0.58	0.143	0	Epithelial cells
SDHD	0	0.494097	0.71	0.352	0	Epithelial cells
HSF1	0	0.493573	0.669	0.201	0	Epithelial cells
LRPPRC	0	0.493227	0.645	0.218	0	Epithelial cells
TKT	0	0.492256	0.735	0.378	0	Epithelial cells
CDK4	0	0.49223	0.638	0.213	0	Epithelial cells
CLDN16	0	0.490944	0.241	0.013	0	Epithelial cells
ESR1	0	0.490763	0.387	0.036	0	Epithelial cells
IDO1	0	0.490488	0.201	0.032	0	Epithelial cells
TMC4	0	0.489346	0.472	0.015	0	Epithelial cells
WASL	0	0.489318	0.578	0.138	0	Epithelial cells
ESPN	0	0.488784	0.442	0.015	0	Epithelial cells
SLC44A2	0	0.488679	0.612	0.142	0	Epithelial cells
PABPC4	0	0.488463	0.749	0.352	0	Epithelial cells
YIPF3	0	0.487786	0.7	0.298	0	Epithelial cells
PLXNB1	0	0.487477	0.487	0.045	0	Epithelial cells
SMARCD3	0	0.48699	0.433	0.057	0	Epithelial cells
TP53I3	0	0.486819	0.56	0.109	0	Epithelial cells
PGLS	0	0.485998	0.734	0.383	0	Epithelial cells
IL1R11	0	0.485732	0.46	0.095	0	Epithelial cells
DCUN1D5	0	0.485605	0.596	0.189	0	Epithelial cells
CYP4B1	0	0.484861	0.208	0.021	0	Epithelial cells
ARL2	0	0.484384	0.683	0.282	0	Epithelial cells
IL13RA1	0	0.483807	0.596	0.163	0	Epithelial cells
PFDN4	0	0.483428	0.684	0.282	0	Epithelial cells
ATP6V1D	0	0.482198	0.644	0.291	0	Epithelial cells
FAM3C	0	0.48188	0.684	0.294	0	Epithelial cells
RAD23B	0	0.481305	0.688	0.279	0	Epithelial cells
PPP2R1A	0	0.480718	0.709	0.317	0	Epithelial cells
EEF1E1	0	0.480224	0.634	0.224	0	Epithelial cells
EIF2S3	0	0.480207	0.742	0.391	0	Epithelial cells
STRAP	0	0.478711	0.652	0.279	0	Epithelial cells
LINC00665	0	0.477165	0.547	0.053	0	Epithelial cells
PAICS	0	0.477031	0.596	0.16	0	Epithelial cells
RTL8A	0	0.477015	0.61	0.142	0	Epithelial cells
CHPF	0	0.476812	0.583	0.138	0	Epithelial cells
TPD52	0	0.475662	0.626	0.147	0	Epithelial cells
TMEM147	0	0.47528	0.719	0.354	0	Epithelial cells
MLEC	0	0.474852	0.703	0.363	0	Epithelial cells
ACSM3	0	0.474672	0.33	0.021	0	Epithelial cells
ECI1	0	0.474633	0.626	0.24	0	Epithelial cells
SFN	0	0.474287	0.349	0.009	0	Epithelial cells
KAZN	0	0.473894	0.451	0.047	0	Epithelial cells
INHBB	0	0.473673	0.405	0.01	0	Epithelial cells
NCBP2-AS2	0	0.472814	0.601	0.197	0	Epithelial cells
SLC9A3R2	0	0.471999	0.584	0.103	0	Epithelial cells
ST6GALNAC1	0	0.470758	0.389	0.013	0	Epithelial cells
NRN1	0	0.470217	0.187	0.016	0	Epithelial cells
VTI1B	0	0.469954	0.649	0.288	0	Epithelial cells
SCD5	0	0.469878	0.425	0.047	0	Epithelial cells
RCN1	0	0.468661	0.65	0.2	0	Epithelial cells
PRDX3	0	0.468632	0.685	0.298	0	Epithelial cells
SFRP1	0	0.46837	0.196	0.03	0	Epithelial cells
VGLL4	0	0.467933	0.673	0.241	0	Epithelial cells
HSPA4	0	0.466871	0.669	0.277	0	Epithelial cells
PCYOX1	0	0.466871	0.566	0.125	0	Epithelial cells
SDHC	0	0.466849	0.709	0.312	0	Epithelial cells
TMEM125	0	0.465181	0.504	0.009	0	Epithelial cells
NR2F2	0	0.465022	0.624	0.095	0	Epithelial cells
PAIP1	0	0.463801	0.644	0.206	0	Epithelial cells
POLR2J	0	0.463382	0.758	0.433	0	Epithelial cells
MFSD3	0	0.463217	0.523	0.067	0	Epithelial cells
MKKS	0	0.463216	0.635	0.237	0	Epithelial cells
H2AFJ	0	0.461597	0.703	0.361	0	Epithelial cells
NMB	0	0.460945	0.444	0.073	0	Epithelial cells
CGN	0	0.460929	0.477	0.01	0	Epithelial cells
SQLE	0	0.458397	0.564	0.16	0	Epithelial cells
AKR1C3	0	0.458194	0.282	0.027	0	Epithelial cells
CAPS	0	0.457332	0.409	0.055	0	Epithelial cells
PPP1R9A	0	0.457256	0.498	0.024	0	Epithelial cells
C1orf43	0	0.457083	0.723	0.342	0	Epithelial cells
SHARPIN	0	0.456728	0.659	0.228	0	Epithelial cells
LGR4	0	0.456305	0.451	0.022	0	Epithelial cells
ADRM1	0	0.455405	0.705	0.368	0	Epithelial cells
APEX1	0	0.454957	0.711	0.336	0	Epithelial cells
HSPA9	0	0.454724	0.747	0.403	0	Epithelial cells
DHRS3	0	0.453609	0.408	0.158	0	Epithelial cells
ITGB4	0	0.453461	0.455	0.022	0	Epithelial cells
EGLN3	0	0.453152	0.401	0.056	0	Epithelial cells
GRB7	0	0.453055	0.43	0.01	0	Epithelial cells
MGMT	0	0.452704	0.699	0.323	0	Epithelial cells
MROH1	0	0.452679	0.553	0.128	0	Epithelial cells
CAPZA2	0	0.452335	0.736	0.377	0	Epithelial cells
RAB4A	0	0.451073	0.623	0.204	0	Epithelial cells
PRPF6	0	0.45099	0.686	0.286	0	Epithelial cells
AKAP12	0	0.450829	0.276	0.05	0	Epithelial cells
CELSR2	0	0.450506	0.476	0.014	0	Epithelial cells
BEND7	0	0.450113	0.482	0.016	0	Epithelial cells
VASN	0	0.448544	0.479	0.058	0	Epithelial cells
ARHGAP5	0	0.447241	0.603	0.185	0	Epithelial cells
TPRKB	0	0.447047	0.636	0.257	0	Epithelial cells
COL18A1	0	0.446045	0.626	0.148	0	Epithelial cells
RIMKLB	0	0.446044	0.467	0.052	0	Epithelial cells
GALNT3	0	0.445786	0.517	0.052	0	Epithelial cells
ZNF358	0	0.445358	0.532	0.098	0	Epithelial cells
C20orf24	0	0.445128	0.719	0.374	0	Epithelial cells
TCEA2	0	0.444627	0.563	0.13	0	Epithelial cells
TWF1	0	0.443829	0.618	0.174	0	Epithelial cells
TMEM54	0	0.44347	0.461	0.043	0	Epithelial cells
MYH14	0	0.442765	0.444	0.011	0	Epithelial cells
BOLA3	0	0.442656	0.659	0.266	0	Epithelial cells
DNAJB11	0	0.442538	0.61	0.269	0	Epithelial cells
SLC44A1	0	0.442484	0.602	0.18	0	Epithelial cells
EIF2S1	0	0.44208	0.614	0.275	0	Epithelial cells
DEPTOR	0	0.441592	0.411	0.035	0	Epithelial cells
C8orf82	0	0.441522	0.606	0.149	0	Epithelial cells
CSE1L	0	0.441314	0.58	0.146	0	Epithelial cells
MPP7	0	0.441073	0.445	0.025	0	Epithelial cells
ST6GAL1	0	0.440789	0.558	0.214	0	Epithelial cells
PKP4	0	0.440683	0.484	0.061	0	Epithelial cells
FOLR3	0	0.439937	0.262	0.007	0	Epithelial cells
IRF2BP2	0	0.438987	0.738	0.383	0	Epithelial cells
CD2AP	0	0.438767	0.659	0.223	0	Epithelial cells
GPRC5B	0	0.43871	0.403	0.03	0	Epithelial cells
LAGE3	0	0.438676	0.638	0.255	0	Epithelial cells
HS6ST1	0	0.437808	0.49	0.055	0	Epithelial cells
AP002884.3	0	0.436766	0.45	0.029	0	Epithelial cells
MAGED1	0	0.436717	0.562	0.149	0	Epithelial cells
SSSCA1	0	0.434634	0.642	0.232	0	Epithelial cells
SEMA3B	0	0.434393	0.354	0.03	0	Epithelial cells
CARHSP1	0	0.434224	0.722	0.335	0	Epithelial cells
C6orf48	0	0.43399	0.716	0.355	0	Epithelial cells
P4HA1	0	0.433767	0.588	0.246	0	Epithelial cells
TSEN34	0	0.432981	0.619	0.196	0	Epithelial cells
FAM84B	0	0.432559	0.477	0.024	0	Epithelial cells
UGT2B7	0	0.432499	0.292	0.004	0	Epithelial cells
MAP3K20	0	0.432178	0.482	0.098	0	Epithelial cells
KRT5	0	0.432169	0.167	0.004	0	Epithelial cells
TFAP2C	0	0.43155	0.417	0.017	0	Epithelial cells
UBE2E3	0	0.431364	0.634	0.22	0	Epithelial cells
GADD45A1	0	0.431273	0.584	0.234	0	Epithelial cells
PTTG1IP	0	0.430804	0.722	0.345	0	Epithelial cells
PRSS21	0	0.430699	0.336	0.023	0	Epithelial cells
ATP6V1B1	0	0.430027	0.26	0.016	0	Epithelial cells
FGFR1	0	0.429347	0.537	0.109	0	Epithelial cells
ATG101	0	0.428488	0.636	0.218	0	Epithelial cells
CXCL16	0	0.428167	0.593	0.148	0	Epithelial cells
BTG31	0	0.427681	0.66	0.287	0	Epithelial cells
TNKS1BP1	0	0.427589	0.476	0.069	0	Epithelial cells
HSD17B12	0	0.427394	0.632	0.22	0	Epithelial cells
LACTB2	0	0.427337	0.509	0.101	0	Epithelial cells
TJP2	0	0.427221	0.473	0.05	0	Epithelial cells
RNF150	0	0.426772	0.387	0.026	0	Epithelial cells
CCDC151	0	0.426607	0.351	0.012	0	Epithelial cells
RERE	0	0.426344	0.653	0.234	0	Epithelial cells
SVIL	0	0.42625	0.506	0.095	0	Epithelial cells
CDC42BPB	0	0.425923	0.533	0.114	0	Epithelial cells
RHPN1	0	0.42576	0.458	0.038	0	Epithelial cells
ABLIM1	0	0.425675	0.57	0.114	0	Epithelial cells
SESN3	0	0.425348	0.46	0.156	0	Epithelial cells
CCDC146	0	0.425129	0.332	0.09	0	Epithelial cells
ALDH6A1	0	0.424968	0.425	0.062	0	Epithelial cells
MROH6	0	0.424206	0.437	0.032	0	Epithelial cells
NAA10	0	0.422697	0.688	0.328	0	Epithelial cells
ERG28	0	0.422185	0.554	0.181	0	Epithelial cells
TMED4	0	0.421999	0.723	0.386	0	Epithelial cells
SDC2	0	0.420933	0.342	0.077	0	Epithelial cells
COA6	0	0.420414	0.684	0.306	0	Epithelial cells
SERINC2	0	0.420201	0.503	0.063	0	Epithelial cells
RAB3D	0	0.419144	0.471	0.045	0	Epithelial cells
ADAM15	0	0.41907	0.549	0.106	0	Epithelial cells
TEAD1	0	0.41885	0.454	0.083	0	Epithelial cells
NCBP2	0	0.41846	0.684	0.292	0	Epithelial cells
PALMD	0	0.417939	0.335	0.037	0	Epithelial cells
CMAS	0	0.417781	0.551	0.143	0	Epithelial cells
SPTSSA	0	0.417614	0.584	0.202	0	Epithelial cells
RAB22A	0	0.417505	0.619	0.203	0	Epithelial cells
PFN2	0	0.41727	0.484	0.071	0	Epithelial cells
B4GALT1	0	0.417229	0.621	0.275	0	Epithelial cells
TMEM179B	0	0.416918	0.682	0.345	0	Epithelial cells
NUDCD2	0	0.416032	0.634	0.25	0	Epithelial cells
NNMT	0	0.415765	0.446	0.115	0	Epithelial cells
KHDRBS3	0	0.414928	0.434	0.039	0	Epithelial cells
BAIAP2L1	0	0.414417	0.472	0.023	0	Epithelial cells
LAD1	0	0.414182	0.425	0.008	0	Epithelial cells
AIF1L	0	0.413665	0.424	0.022	0	Epithelial cells
STT3A	0	0.413614	0.582	0.161	0	Epithelial cells
SLC25A23	0	0.41354	0.49	0.054	0	Epithelial cells
MAGEA4	0	0.412681	0.116	0.006	0	Epithelial cells
BCL7C	0	0.41178	0.702	0.331	0	Epithelial cells
RBM7	0	0.411545	0.582	0.17	0	Epithelial cells
PAPSS1	0	0.410863	0.504	0.196	0	Epithelial cells
LEMD1	0	0.410707	0.309	0.007	0	Epithelial cells
SLC52A2	0	0.410457	0.629	0.219	0	Epithelial cells
HES4	0	0.410203	0.451	0.089	0	Epithelial cells
TMEM256	0	0.409423	0.667	0.324	0	Epithelial cells
DNALI1	0	0.409407	0.416	0.032	0	Epithelial cells
TMEM139	0	0.40861	0.397	0.008	0	Epithelial cells
PEPD	0	0.408505	0.557	0.234	0	Epithelial cells
SHTN1	0	0.408286	0.545	0.118	0	Epithelial cells
GDF3	0	0.407755	0.162	0.005	0	Epithelial cells
RRAS	0	0.407283	0.604	0.191	0	Epithelial cells
RNF114	0	0.407081	0.7	0.293	0	Epithelial cells
ARF3	0	0.407018	0.684	0.284	0	Epithelial cells
ZNF664	0	0.406947	0.566	0.112	0	Epithelial cells
CCDC34	0	0.406134	0.432	0.089	0	Epithelial cells
PLA2G12A	0	0.40602	0.512	0.108	0	Epithelial cells
PARD3	0	0.405945	0.497	0.048	0	Epithelial cells
NORAD	0	0.405775	0.726	0.359	0	Epithelial cells
RAB5B	0	0.40565	0.603	0.172	0	Epithelial cells
CACUL1	0	0.40505	0.637	0.192	0	Epithelial cells
TCF7L2	0	0.404715	0.493	0.082	0	Epithelial cells
YWHAG	0	0.404134	0.656	0.261	0	Epithelial cells
BOP1	0	0.404122	0.544	0.117	0	Epithelial cells
CDH6	0	0.403978	0.348	0.014	0	Epithelial cells
ECE2	0	0.403958	0.419	0.042	0	Epithelial cells
ARSD	0	0.402068	0.56	0.127	0	Epithelial cells
ZHX1	0	0.401911	0.534	0.161	0	Epithelial cells
C11orf71	0	0.401533	0.462	0.066	0	Epithelial cells
RAB1A	0	0.40124	0.701	0.321	0	Epithelial cells
FH	0	0.400855	0.552	0.146	0	Epithelial cells
PRSS23	0	0.400545	0.535	0.108	0	Epithelial cells
PSAT1	0	0.400409	0.385	0.057	0	Epithelial cells
DDB1	0	0.400237	0.665	0.266	0	Epithelial cells
MTHFD2L	0	0.399995	0.507	0.085	0	Epithelial cells
HIST1H2AC	0	0.399909	0.572	0.227	0	Epithelial cells
HSBP1L1	0	0.399793	0.516	0.085	0	Epithelial cells
LARP1	0	0.399711	0.718	0.353	0	Epithelial cells
LDOC1	0	0.399534	0.439	0.039	0	Epithelial cells
EGLN1	0	0.399518	0.572	0.155	0	Epithelial cells
C21orf59	0	0.399016	0.63	0.223	0	Epithelial cells
SND1	0	0.398976	0.629	0.248	0	Epithelial cells
CISD1	0	0.398973	0.612	0.201	0	Epithelial cells
ATL3	0	0.398752	0.625	0.225	0	Epithelial cells
UCHL1	0	0.398722	0.297	0.055	0	Epithelial cells
NDUFV3	0	0.398216	0.621	0.288	0	Epithelial cells
MYC	0	0.397685	0.459	0.116	0	Epithelial cells
DCDC2	0	0.397455	0.414	0.027	0	Epithelial cells
SMARCA4	0	0.39698	0.653	0.243	0	Epithelial cells
MPZL1	0	0.395891	0.593	0.159	0	Epithelial cells
AAMP	0	0.395769	0.64	0.214	0	Epithelial cells
REPIN1	0	0.395761	0.588	0.176	0	Epithelial cells
COMTD1	0	0.395657	0.557	0.162	0	Epithelial cells
LRP5	0	0.394907	0.475	0.033	0	Epithelial cells
PLOD1	0	0.394674	0.504	0.155	0	Epithelial cells
GPT2	0	0.394187	0.443	0.029	0	Epithelial cells
ARHGEF35	0	0.393143	0.472	0.034	0	Epithelial cells
ZKSCAN1	0	0.392837	0.679	0.278	0	Epithelial cells
TSPAN15	0	0.392826	0.487	0.054	0	Epithelial cells
TFG	0	0.392684	0.681	0.282	0	Epithelial cells
C1orf198	0	0.392611	0.471	0.056	0	Epithelial cells
ATP9A	0	0.392554	0.459	0.03	0	Epithelial cells
DPCD	0	0.392307	0.491	0.079	0	Epithelial cells
MYOF	0	0.392248	0.506	0.153	0	Epithelial cells
WLS	0	0.391831	0.48	0.081	0	Epithelial cells
BAG5	0	0.391733	0.604	0.179	0	Epithelial cells
CD59	0	0.391514	0.704	0.335	0	Epithelial cells
LAMA3	0	0.39138	0.236	0.006	0	Epithelial cells
TOP1MT	0	0.391306	0.484	0.059	0	Epithelial cells
PLD3	0	0.39122	0.67	0.309	0	Epithelial cells
TUBB2B	0	0.391027	0.179	0.006	0	Epithelial cells
KLHL24	0	0.39088	0.599	0.199	0	Epithelial cells
ASAP2	0	0.390705	0.423	0.039	0	Epithelial cells
CHRAC1	0	0.390487	0.605	0.176	0	Epithelial cells
RHOD	0	0.390271	0.427	0.031	0	Epithelial cells
MTHFD2	0	0.390194	0.576	0.217	0	Epithelial cells
ABI2	0	0.390047	0.618	0.202	0	Epithelial cells
CHMP3	0	0.389341	0.688	0.285	0	Epithelial cells
TOMM34	0	0.389204	0.482	0.071	0	Epithelial cells
PTPN14	0	0.38918	0.481	0.08	0	Epithelial cells
XPR1	0	0.38888	0.498	0.075	0	Epithelial cells
ING2	0	0.388832	0.498	0.134	0	Epithelial cells
PAFAH1B3	0	0.388595	0.574	0.166	0	Epithelial cells
FARP1	0	0.388153	0.557	0.126	0	Epithelial cells
SAMD1	0	0.388076	0.642	0.229	0	Epithelial cells
JPT2	0	0.387951	0.55	0.1	0	Epithelial cells
ZNF593	0	0.387618	0.618	0.21	0	Epithelial cells
ZBTB44	0	0.387524	0.617	0.198	0	Epithelial cells
NIPSNAP2	0	0.38735	0.619	0.211	0	Epithelial cells
PIN4	0	0.387297	0.681	0.303	0	Epithelial cells
KCNMA1	0	0.38714	0.265	0.056	0	Epithelial cells
TMEM30B	0	0.387029	0.421	0.01	0	Epithelial cells
RBM17	0	0.386949	0.734	0.374	0	Epithelial cells
MRPS35	0	0.385278	0.582	0.158	0	Epithelial cells
C19orf48	0	0.385145	0.509	0.128	0	Epithelial cells
STAP2	0	0.384551	0.401	0.033	0	Epithelial cells
ALKBH7	0	0.384472	0.665	0.312	0	Epithelial cells
MT1M	0	0.383885	0.23	0.03	0	Epithelial cells
CAMLG	0	0.383262	0.679	0.298	0	Epithelial cells
PTOV1	0	0.382913	0.606	0.193	0	Epithelial cells
UQCRC1	0	0.382382	0.671	0.304	0	Epithelial cells
IER5L	0	0.382379	0.617	0.279	0	Epithelial cells
LINC01133	0	0.382357	0.223	0.006	0	Epithelial cells
PFKP	0	0.38232	0.611	0.215	0	Epithelial cells
SEC13	0	0.382199	0.62	0.24	0	Epithelial cells
ADGRG1	0	0.38172	0.601	0.102	0	Epithelial cells
SEMA4B	0	0.381604	0.46	0.058	0	Epithelial cells
SLC39A1	0	0.380848	0.626	0.223	0	Epithelial cells
CLDN6	0	0.380609	0.243	0.002	0	Epithelial cells
RBBP8	0	0.380026	0.496	0.092	0	Epithelial cells
BARX1	0	0.379949	0.159	0.008	0	Epithelial cells
ETF1	0	0.379864	0.62	0.223	0	Epithelial cells
GPI	0	0.379659	0.674	0.279	0	Epithelial cells
IDH1	0	0.379095	0.569	0.164	0	Epithelial cells
KIF1BP	0	0.378905	0.483	0.112	0	Epithelial cells
PTN	0	0.377807	0.25	0.043	0	Epithelial cells
LINC01503	0	0.377785	0.362	0.034	0	Epithelial cells
DNAJC12	0	0.377778	0.23	0.028	0	Epithelial cells
EIF6	0	0.377627	0.704	0.36	0	Epithelial cells
IGF1R	0	0.377614	0.457	0.052	0	Epithelial cells
PARL	0	0.377461	0.587	0.206	0	Epithelial cells
TMOD1	0	0.377452	0.343	0.023	0	Epithelial cells
CCNY	0	0.377299	0.617	0.201	0	Epithelial cells
RPL7L1	0	0.376852	0.742	0.386	0	Epithelial cells
MTIF2	0	0.376753	0.531	0.129	0	Epithelial cells
CDH3	0	0.376529	0.409	0.015	0	Epithelial cells
C19orf81	0	0.3764	0.416	0.014	0	Epithelial cells
MRPL4	0	0.3761	0.664	0.26	0	Epithelial cells
CX3CL1	0	0.375783	0.338	0.017	0	Epithelial cells
CTXN1	0	0.375688	0.412	0.018	0	Epithelial cells
NME4	0	0.375424	0.571	0.165	0	Epithelial cells
SUMF1	0	0.375285	0.482	0.082	0	Epithelial cells
SCARA3	0	0.375262	0.337	0.018	0	Epithelial cells
LPAR3	0	0.374906	0.313	0.008	0	Epithelial cells
TARS	0	0.374898	0.612	0.237	0	Epithelial cells
TUSC3	0	0.374857	0.492	0.064	0	Epithelial cells
FMC1	0	0.374642	0.578	0.202	0	Epithelial cells
AMOT	0	0.374632	0.365	0.015	0	Epithelial cells
CTDSP2	0	0.373682	0.624	0.214	0	Epithelial cells
LYPD6B	0	0.373518	0.399	0.005	0	Epithelial cells
DVL3	0	0.373063	0.566	0.174	0	Epithelial cells
PDZD8	0	0.373018	0.516	0.115	0	Epithelial cells
ODC11	0	0.372977	0.61	0.258	0	Epithelial cells
ERI3	0	0.372594	0.559	0.144	0	Epithelial cells
SH3RF1	0	0.372292	0.419	0.044	0	Epithelial cells
SNHG19	0	0.371923	0.413	0.068	0	Epithelial cells
MRPL3	0	0.371708	0.635	0.251	0	Epithelial cells
SRGAP1	0	0.371475	0.479	0.094	0	Epithelial cells
MAP7	0	0.371364	0.446	0.023	0	Epithelial cells
UROS	0	0.371249	0.605	0.233	0	Epithelial cells
RHOC	0	0.371067	0.734	0.369	0	Epithelial cells
PROM2	0	0.37072	0.336	0.016	0	Epithelial cells
FAM200B	0	0.370632	0.575	0.219	0	Epithelial cells
ZSCAN18	0	0.370608	0.499	0.105	0	Epithelial cells
ZNF667-AS1	0	0.370289	0.461	0.045	0	Epithelial cells
BACE1	0	0.370262	0.484	0.079	0	Epithelial cells
WDR77	0	0.370255	0.5	0.126	0	Epithelial cells
HIKESHI	0	0.369668	0.619	0.272	0	Epithelial cells
DGAT1	0	0.369574	0.573	0.157	0	Epithelial cells
SLC2A4RG	0	0.369437	0.644	0.234	0	Epithelial cells
CHCHD3	0	0.369285	0.58	0.196	0	Epithelial cells
YES1	0	0.36922	0.52	0.106	0	Epithelial cells
AP002360.2	0	0.369185	0.405	0.031	0	Epithelial cells
LLGL2	0	0.368553	0.579	0.123	0	Epithelial cells
HIPK2	0	0.368266	0.518	0.167	0	Epithelial cells
TNNC1	0	0.367896	0.267	0.005	0	Epithelial cells
PITX1	0	0.366817	0.342	0.006	0	Epithelial cells
FZD6	0	0.366695	0.475	0.045	0	Epithelial cells
MXI1	0	0.36668	0.54	0.114	0	Epithelial cells
MRPS18A	0	0.366576	0.583	0.18	0	Epithelial cells
SHMT2	0	0.365866	0.546	0.179	0	Epithelial cells
ATP13A3	0	0.365774	0.601	0.207	0	Epithelial cells
LRG1	0	0.365749	0.379	0.015	0	Epithelial cells
MYO10	0	0.365747	0.434	0.064	0	Epithelial cells
SAMD12	0	0.365698	0.409	0.027	0	Epithelial cells
ALDH3B2	0	0.364203	0.326	0.004	0	Epithelial cells
MACC1	0	0.364132	0.324	0.048	0	Epithelial cells
FDX1	0	0.364003	0.627	0.291	0	Epithelial cells
DPM1	0	0.363947	0.617	0.223	0	Epithelial cells
KCMF1	0	0.363791	0.635	0.238	0	Epithelial cells
SCYL1	0	0.363349	0.601	0.187	0	Epithelial cells
AC027031.2	0	0.363259	0.378	0.028	0	Epithelial cells
TOR1AIP2	0	0.363026	0.649	0.239	0	Epithelial cells
KIF1B	0	0.362969	0.571	0.148	0	Epithelial cells
TBC1D17	0	0.362554	0.515	0.104	0	Epithelial cells
MYH10	0	0.362459	0.469	0.078	0	Epithelial cells
MTCH2	0	0.36242	0.626	0.223	0	Epithelial cells
TMPRSS3	0	0.362212	0.427	0.026	0	Epithelial cells
IL1RAP	0	0.362149	0.395	0.068	0	Epithelial cells
LARP6	0	0.362013	0.42	0.04	0	Epithelial cells
MCRIP2	0	0.361515	0.533	0.155	0	Epithelial cells
DKC1	0	0.361275	0.601	0.207	0	Epithelial cells
MCTS1	0	0.361139	0.665	0.32	0	Epithelial cells
TRIM47	0	0.361021	0.45	0.084	0	Epithelial cells
SPAG16	0	0.360419	0.523	0.103	0	Epithelial cells
MCFD2	0	0.36007	0.608	0.211	0	Epithelial cells
GSN	0	0.360036	0.709	0.304	0	Epithelial cells
PRSS2	0	0.35959	0.237	0.004	0	Epithelial cells
B4GALT5	0	0.35816	0.555	0.15	0	Epithelial cells
TRIM44	0	0.357652	0.667	0.311	0	Epithelial cells
GLRX3	0	0.357549	0.646	0.264	0	Epithelial cells
FBL	0	0.35721	0.672	0.301	0	Epithelial cells
MTA3	0	0.357094	0.516	0.091	0	Epithelial cells
CCL28	0	0.356798	0.42	0.056	0	Epithelial cells
ZNF217	0	0.356749	0.613	0.259	0	Epithelial cells
HDGFL3	0	0.356634	0.489	0.103	0	Epithelial cells
MEA1	0	0.356517	0.615	0.232	0	Epithelial cells
TMEM106C	0	0.356477	0.569	0.169	0	Epithelial cells
RCOR1	0	0.356465	0.524	0.119	0	Epithelial cells
ACTL6A	0	0.356065	0.539	0.177	0	Epithelial cells
PXDN	0	0.355923	0.418	0.092	0	Epithelial cells
ST5	0	0.355857	0.482	0.109	0	Epithelial cells
DDRGK1	0	0.355756	0.66	0.308	0	Epithelial cells
TIMM9	0	0.355097	0.542	0.193	0	Epithelial cells
BCL11A	0	0.3549	0.416	0.027	0	Epithelial cells
DMAC1	0	0.354793	0.625	0.277	0	Epithelial cells
SLC50A1	0	0.354703	0.605	0.192	0	Epithelial cells
CLINT1	0	0.354314	0.692	0.315	0	Epithelial cells
MRPL32	0	0.3542	0.653	0.267	0	Epithelial cells
WDR34	0	0.354175	0.483	0.085	0	Epithelial cells
SSPN	0	0.353769	0.464	0.116	0	Epithelial cells
DNAJC10	0	0.353366	0.623	0.247	0	Epithelial cells
EPB41L5	0	0.353324	0.4	0.021	0	Epithelial cells
REEP3	0	0.35278	0.608	0.203	0	Epithelial cells
PDLIM5	0	0.352673	0.554	0.184	0	Epithelial cells
TIMP1	0	0.352191	0.816	0.371	0	Epithelial cells
PLOD2	0	0.351973	0.488	0.1	0	Epithelial cells
VAPB	0	0.351361	0.568	0.14	0	Epithelial cells
GAL	0	0.351093	0.204	0.004	0	Epithelial cells
SIX1	0	0.350946	0.253	0.005	0	Epithelial cells
LDLR	0	0.3508	0.441	0.116	0	Epithelial cells
GDE1	0	0.350574	0.56	0.178	0	Epithelial cells
PALM3	0	0.349822	0.308	0.009	0	Epithelial cells
CTSF	0	0.349573	0.498	0.099	0	Epithelial cells
CTDSPL	0	0.349158	0.46	0.065	0	Epithelial cells
CRACR2B	0	0.348579	0.441	0.057	0	Epithelial cells
PDXDC1	0	0.348088	0.601	0.204	0	Epithelial cells
MRPL37	0	0.347994	0.562	0.155	0	Epithelial cells
COL9A1	0	0.347676	0.11	0.004	0	Epithelial cells
LRRC42	0	0.347632	0.502	0.078	0	Epithelial cells
EBAG9	0	0.347383	0.595	0.188	0	Epithelial cells
CTSV	0	0.345453	0.318	0.015	0	Epithelial cells
DCAF13	0	0.345264	0.61	0.223	0	Epithelial cells
LRIG1	0	0.345071	0.449	0.078	0	Epithelial cells
MALSU1	0	0.344796	0.599	0.202	0	Epithelial cells
RHOQ	0	0.344473	0.565	0.203	0	Epithelial cells
EVA1C	0	0.344471	0.349	0.035	0	Epithelial cells
MATN2	0	0.344433	0.429	0.027	0	Epithelial cells
CDS1	0	0.344087	0.408	0.017	0	Epithelial cells
LINC01006	0	0.343859	0.431	0.029	0	Epithelial cells
MKRN1	0	0.343848	0.629	0.246	0	Epithelial cells
WDR13	0	0.343706	0.586	0.163	0	Epithelial cells
SORD	0	0.343326	0.394	0.057	0	Epithelial cells
GPR27	0	0.34319	0.35	0.012	0	Epithelial cells
WNT7A	0	0.343051	0.23	0.004	0	Epithelial cells
CHL1	0	0.342918	0.222	0.017	0	Epithelial cells
WTIP	0	0.342897	0.368	0.049	0	Epithelial cells
SORBS2	0	0.342773	0.366	0.056	0	Epithelial cells
MSH6	0	0.342404	0.54	0.139	0	Epithelial cells
AR	0	0.342404	0.275	0.037	0	Epithelial cells
ATL2	0	0.342149	0.509	0.092	0	Epithelial cells
DFFA	0	0.341935	0.582	0.175	0	Epithelial cells
TSPAN13	0	0.341432	0.424	0.06	0	Epithelial cells
NECTIN4	0	0.341274	0.352	0.013	0	Epithelial cells
DCTPP1	0	0.341228	0.609	0.214	0	Epithelial cells
MTA1	0	0.340866	0.566	0.152	0	Epithelial cells
LAMB2	0	0.340491	0.459	0.109	0	Epithelial cells
SEPHS1	0	0.339912	0.534	0.139	0	Epithelial cells
SGPL1	0	0.339892	0.535	0.14	0	Epithelial cells
STX3	0	0.339886	0.49	0.09	0	Epithelial cells
GSTO2	0	0.339788	0.388	0.017	0	Epithelial cells
POP7	0	0.339621	0.589	0.19	0	Epithelial cells
PART1	0	0.338988	0.277	0.007	0	Epithelial cells
ADRA2C	0	0.338981	0.289	0.011	0	Epithelial cells
FAM107A	0	0.338789	0.247	0.011	0	Epithelial cells
FUNDC2	0	0.338668	0.604	0.242	0	Epithelial cells
IFT172	0	0.337819	0.378	0.033	0	Epithelial cells
ZPR1	0	0.337735	0.551	0.173	0	Epithelial cells
TEAD2	0	0.337674	0.451	0.043	0	Epithelial cells
SLCO3A1	0	0.33722	0.448	0.146	0	Epithelial cells
NME1	0	0.337091	0.641	0.283	0	Epithelial cells
ETV4	0	0.337039	0.287	0.015	0	Epithelial cells
EXT1	0	0.336948	0.487	0.101	0	Epithelial cells
ISOC2	0	0.336536	0.599	0.232	0	Epithelial cells
GATA6	0	0.336309	0.307	0.024	0	Epithelial cells
SLC7A8	0	0.33612	0.438	0.064	0	Epithelial cells
PRSS22	0	0.335451	0.342	0.007	0	Epithelial cells
TPM2	0	0.335263	0.517	0.162	0	Epithelial cells
PYCR1	0	0.334259	0.412	0.073	0	Epithelial cells
SLC35F2	0	0.334222	0.477	0.073	0	Epithelial cells
TSHZ2	0	0.333443	0.497	0.113	0	Epithelial cells
MOAP1	0	0.333415	0.504	0.12	0	Epithelial cells
SUCLG1	0	0.333136	0.653	0.294	0	Epithelial cells
SERPINB6	0	0.333017	0.605	0.242	0	Epithelial cells
CHD7	0	0.332443	0.507	0.101	0	Epithelial cells
ARL5B	0	0.331905	0.514	0.151	0	Epithelial cells
RAB6A	0	0.331522	0.699	0.312	0	Epithelial cells
SRSF8	0	0.331503	0.634	0.229	0	Epithelial cells
AKT1	0	0.331174	0.657	0.285	0	Epithelial cells
ERGIC1	0	0.331043	0.594	0.241	0	Epithelial cells
ARHGAP32	0	0.331031	0.385	0.03	0	Epithelial cells
STYXL1	0	0.331021	0.528	0.112	0	Epithelial cells
PLS3	0	0.330757	0.452	0.091	0	Epithelial cells
RAB34	0	0.330626	0.57	0.174	0	Epithelial cells
CTNNBIP1	0	0.330463	0.552	0.152	0	Epithelial cells
FOXJ1	0	0.3303	0.35	0.006	0	Epithelial cells
SAV1	0	0.330156	0.485	0.114	0	Epithelial cells
PINK1	0	0.329285	0.537	0.133	0	Epithelial cells
GNG12	0	0.329207	0.472	0.072	0	Epithelial cells
GFPT1	0	0.329157	0.582	0.199	0	Epithelial cells
PPP1R13B	0	0.32895	0.435	0.046	0	Epithelial cells
CCDC124	0	0.32894	0.634	0.258	0	Epithelial cells
GNL3	0	0.328896	0.626	0.257	0	Epithelial cells
PTPMT1	0	0.328825	0.603	0.209	0	Epithelial cells
SORL1	0	0.328647	0.604	0.203	0	Epithelial cells
NDUFS3	0	0.328543	0.673	0.323	0	Epithelial cells
SMIM7	0	0.328304	0.701	0.349	0	Epithelial cells
SLC48A1	0	0.328198	0.43	0.061	0	Epithelial cells
AFG3L2	0	0.328011	0.562	0.188	0	Epithelial cells
PRKRA	0	0.327763	0.567	0.173	0	Epithelial cells
NAA20	0	0.327574	0.651	0.291	0	Epithelial cells
MBOAT2	0	0.327525	0.399	0.05	0	Epithelial cells
ZC3H14	0	0.327419	0.561	0.162	0	Epithelial cells
NANS	0	0.327106	0.595	0.246	0	Epithelial cells
BOD1	0	0.326982	0.538	0.146	0	Epithelial cells
GPR160	0	0.326727	0.408	0.044	0	Epithelial cells
RHPN2	0	0.32631	0.373	0.007	0	Epithelial cells
MAGED2	0	0.326101	0.67	0.316	0	Epithelial cells
RAB10	0	0.325806	0.716	0.357	0	Epithelial cells
ANAPC15	0	0.325796	0.545	0.168	0	Epithelial cells
DPM3	0	0.325711	0.631	0.275	0	Epithelial cells
[truncated: 9,596 more rows]
