# Supplementary material for: Comprehensive single-cell and bulk RNA-seq analyses reveal a novel CD8+ T cell-associated prognostic signature in ovarian cancer
Source: Aging (Albany NY). 2024 Jun 25;16(12):10636–56. doi: 10.18632/aging.205966 (PMC11236322; doi:10.18632/aging.205966)
Supplement: Supplementary Table 2 [file aging-16-205966-s003.xlsx]

## Sheet: Supplementary Table 2
Supplementary Table 2. A list of significantly prognostic genes identified by univariate Cox regression analysis.
gene	coef	se	z	p	HR	HRse	HRz	HRp	HRCILL	HRCIUL
CD2	0.277	0.136	2.042	0.041	1.319	0.179	1.783	0.075	1.011	1.721
CD3G	0.3	0.135	2.216	0.027	1.35	0.183	1.915	0.056	1.035	1.76
IFNG	0.291	0.136	2.14	0.032	1.338	0.182	1.856	0.063	1.025	1.748
LTB	0.274	0.136	2.019	0.043	1.315	0.179	1.766	0.077	1.008	1.716
CXCL13	0.482	0.138	3.494	0	1.62	0.224	2.772	0.006	1.236	2.123
GZMB	0.372	0.136	2.73	0.006	1.45	0.197	2.28	0.023	1.11	1.893
SLFN5	-0.328	0.136	-2.414	0.016	0.721	0.098	-2.856	0.004	0.552	0.94
LIMD2	0.331	0.136	2.439	0.015	1.393	0.189	2.076	0.038	1.067	1.818
TRGC2	0.389	0.136	2.849	0.004	1.475	0.201	2.36	0.018	1.129	1.927
PYHIN1	0.297	0.136	2.187	0.029	1.345	0.182	1.892	0.058	1.031	1.755
GPR171	0.298	0.137	2.182	0.029	1.347	0.184	1.887	0.059	1.031	1.761
SPOCK2	-0.428	0.136	-3.155	0.002	0.652	0.088	-3.938	0	0.499	0.85
TRAT1	0.275	0.136	2.018	0.044	1.317	0.18	1.764	0.078	1.008	1.72
CD40LG	0.301	0.136	2.218	0.027	1.351	0.183	1.915	0.055	1.036	1.763
EMB	-0.278	0.135	-2.052	0.04	0.757	0.103	-2.365	0.018	0.581	0.988
SH2D1A	0.382	0.137	2.792	0.005	1.466	0.201	2.321	0.02	1.121	1.917
ALOX5AP	-0.39	0.139	-2.812	0.005	0.677	0.094	-3.44	0.001	0.515	0.888
LINC00861	0.336	0.136	2.469	0.014	1.399	0.19	2.097	0.036	1.072	1.827
ISG20	0.305	0.136	2.251	0.024	1.357	0.184	1.94	0.052	1.04	1.77
CD226	0.32	0.137	2.335	0.02	1.377	0.189	1.999	0.046	1.053	1.801
ZNF831	0.327	0.136	2.398	0.017	1.387	0.189	2.045	0.041	1.062	1.812
EOMES	0.268	0.136	1.968	0.049	1.307	0.178	1.726	0.084	1.001	1.708
ICOS	0.426	0.137	3.108	0.002	1.531	0.21	2.531	0.011	1.17	2.003
CCR7	0.428	0.136	3.138	0.002	1.534	0.209	2.553	0.011	1.174	2.004
S1PR4	0.321	0.137	2.349	0.019	1.378	0.188	2.01	0.044	1.055	1.801
SLAMF1	0.295	0.136	2.161	0.031	1.343	0.183	1.872	0.061	1.028	1.754
SBNO2	-0.34	0.137	-2.472	0.013	0.712	0.098	-2.944	0.003	0.544	0.932
SPG11	-0.283	0.136	-2.091	0.037	0.753	0.102	-2.417	0.016	0.577	0.982
VPS13B	-0.335	0.136	-2.467	0.014	0.715	0.097	-2.93	0.003	0.548	0.933
PRDM2	-0.276	0.136	-2.036	0.042	0.759	0.103	-2.345	0.019	0.581	0.99
GPATCH8	-0.281	0.135	-2.078	0.038	0.755	0.102	-2.399	0.016	0.579	0.984
KAT6A	-0.301	0.136	-2.21	0.027	0.74	0.101	-2.58	0.01	0.566	0.966
XPC	-0.369	0.136	-2.703	0.007	0.692	0.094	-3.269	0.001	0.529	0.904
RNF167	0.285	0.135	2.109	0.035	1.33	0.18	1.836	0.066	1.02	1.732
GPS2	-0.304	0.135	-2.252	0.024	0.738	0.1	-2.633	0.008	0.566	0.961
ZFYVE28	-0.299	0.135	-2.209	0.027	0.742	0.1	-2.574	0.01	0.569	0.967
CHD3	-0.311	0.136	-2.28	0.023	0.733	0.1	-2.675	0.007	0.561	0.957
SRGAP3	-0.28	0.137	-2.041	0.041	0.756	0.104	-2.355	0.019	0.578	0.989
KIAA1109	-0.31	0.135	-2.292	0.022	0.733	0.099	-2.687	0.007	0.562	0.956
NECAP1	-0.298	0.135	-2.2	0.028	0.742	0.101	-2.563	0.01	0.569	0.968
ARRDC3	-0.292	0.135	-2.155	0.031	0.747	0.101	-2.503	0.012	0.573	0.974
MLLT3	0.302	0.135	2.234	0.026	1.352	0.183	1.928	0.054	1.038	1.762
PLEKHF1	-0.271	0.135	-2.007	0.045	0.762	0.103	-2.306	0.021	0.585	0.994
RNPEPL1	-0.283	0.136	-2.087	0.037	0.753	0.102	-2.413	0.016	0.577	0.983
JAK1	-0.309	0.136	-2.277	0.023	0.734	0.1	-2.669	0.008	0.563	0.958
ADCY7	-0.323	0.136	-2.368	0.018	0.724	0.099	-2.795	0.005	0.555	0.946
ZNF407	-0.305	0.135	-2.251	0.024	0.737	0.1	-2.632	0.008	0.566	0.961
IL27RA	-0.27	0.135	-1.995	0.046	0.764	0.103	-2.29	0.022	0.586	0.995
STK39	-0.278	0.135	-2.056	0.04	0.757	0.102	-2.37	0.018	0.581	0.987
FOXO1	-0.328	0.137	-2.405	0.016	0.72	0.098	-2.847	0.004	0.551	0.941
FXYD5	-0.282	0.135	-2.087	0.037	0.754	0.102	-2.411	0.016	0.578	0.983
BTN3A3	0.299	0.135	2.209	0.027	1.348	0.182	1.909	0.056	1.034	1.758
LNPEP	-0.296	0.135	-2.19	0.028	0.743	0.101	-2.55	0.011	0.57	0.969
EIF4E3	0.268	0.135	1.981	0.048	1.308	0.177	1.738	0.082	1.003	1.706
WNK1	-0.353	0.136	-2.606	0.009	0.702	0.095	-3.126	0.002	0.539	0.916
TSC22D4	-0.331	0.136	-2.436	0.015	0.718	0.098	-2.888	0.004	0.55	0.937
ANO9	-0.287	0.135	-2.129	0.033	0.75	0.101	-2.467	0.014	0.576	0.977
PSIP1	0.285	0.135	2.102	0.036	1.329	0.18	1.829	0.067	1.019	1.734
SUSD3	-0.294	0.136	-2.17	0.03	0.745	0.101	-2.523	0.012	0.571	0.972
ARID1B	-0.309	0.135	-2.292	0.022	0.734	0.099	-2.686	0.007	0.564	0.956
ARNTL	-0.293	0.137	-2.134	0.033	0.746	0.102	-2.479	0.013	0.57	0.976
PPP1R2	-0.3	0.135	-2.218	0.027	0.741	0.1	-2.586	0.01	0.568	0.966
DIAPH1	-0.415	0.137	-3.027	0.002	0.66	0.091	-3.753	0	0.504	0.864
JADE2	-0.34	0.136	-2.502	0.012	0.712	0.097	-2.979	0.003	0.546	0.929
